# Supplementary material
Source: publisher figshare collection journal article supplement (https://diabetesjournals.figshare.com/articles/dataset/_/21526041)
Supplement: Supplementary file 1 [file 1]

Table. S1 Primary antibodies used in western blots.

| Name | Manufacturer | Cat No. | Dilution | Reacts with |
| --- | --- | --- | --- | --- |
| PRDX2 | Abcam | Ab09367 | 1:1000 | Mouse, Rat, Human |
| ACSL4 | Abcam | Ab205199 | 1:1000 | Mouse, Human |
| GPX4 | Abcam | Ab125066 | 1:3000 | Mouse, Rat, Human |
| eNOS | CST | 32027S | 1:1000 | Mouse, Rat, Human |
| p-eNOS Ser1177 | Abcam | Ab230158 | 1:1000 | Mouse, Human |
| VEGFR2 | CST | 9698S | 1:1000 | Mouse, Rat, Human, |
| p-VEGFR2 Tyr1175 | CST | 3770S | 1:1000 | Mouse, human |
| Drp1 | CST | 8570S | 1:1000 | Mouse, Rat, Human |
| p-Drp1 Ser616 | Abmart | TA8470 | 1:1000 | Mouse, Rat, Human |
| MFN1 | Abcam | Ab221661 | 1:1000 | Mouse, Rat |
| MFN2 | Abcam | Ab124773 | 1:1000 | Mouse, Rat, Human |
| FIS1 | Abcam | Ab229969 | 1:1000 | Mouse, Human |
| SOD1 | Abcam | Ab51254 | 1:5000 | Mouse, Rat, Human |
| SOD2 | Abcam | Ab68155 | 1:1000 | Mouse, Rat, Human |
| ICAM-1 | BOSTER | BA2189 | 1:500 | Mouse, Rat |
| VCAM-1 | CST | 32653S | 1:1000 | Mouse |
| β-actin | Abcam | Ab8226 | 1:2000 | Mouse, Rat, Human |
| VDAC1 | Abcam | Ab154856 | 1:3000 | Mouse, Rat, Human |
| Nrf1 | CST | 46743 | 1:1000 | Mouse, Rat, Human |
| TFAM | Abcam | Ab252432 | 1:1000 | Mouse, Rat |
| GAPDH | CST | 5174 | 1:1000 | Mouse, Rat, Human |
