# Supplementary material
Source: publisher figshare collection journal article supplement (https://diabetesjournals.figshare.com/articles/dataset/_/21526041)

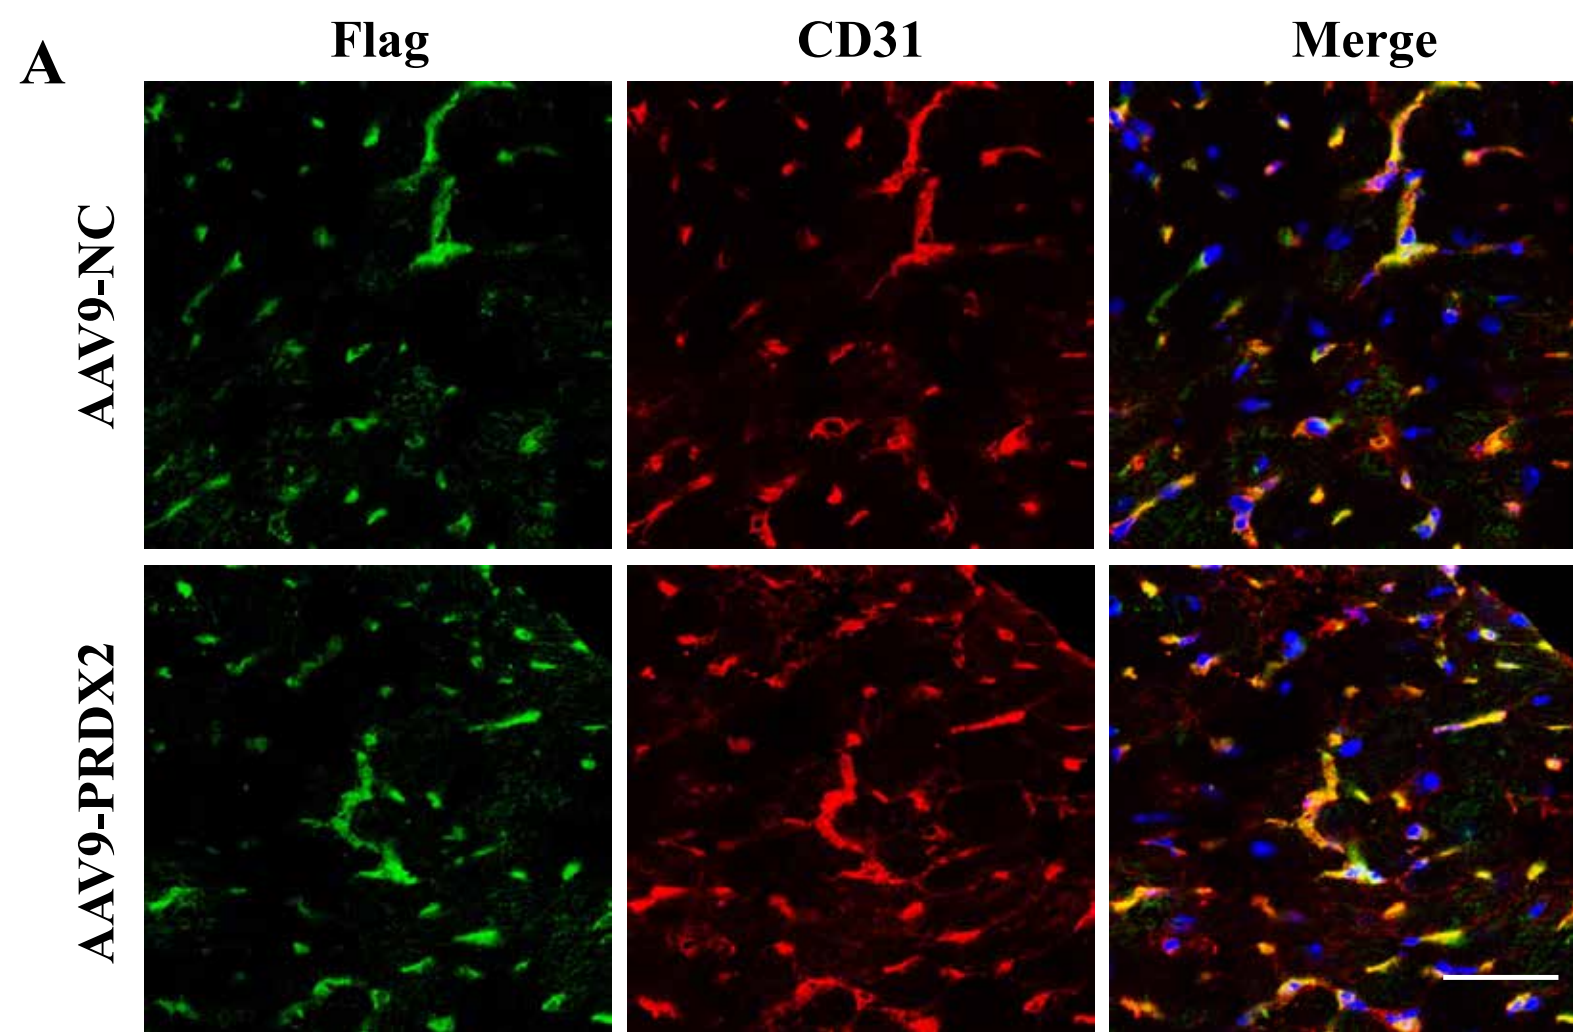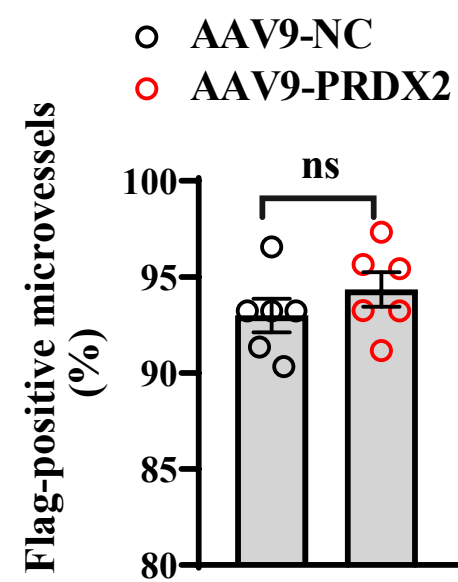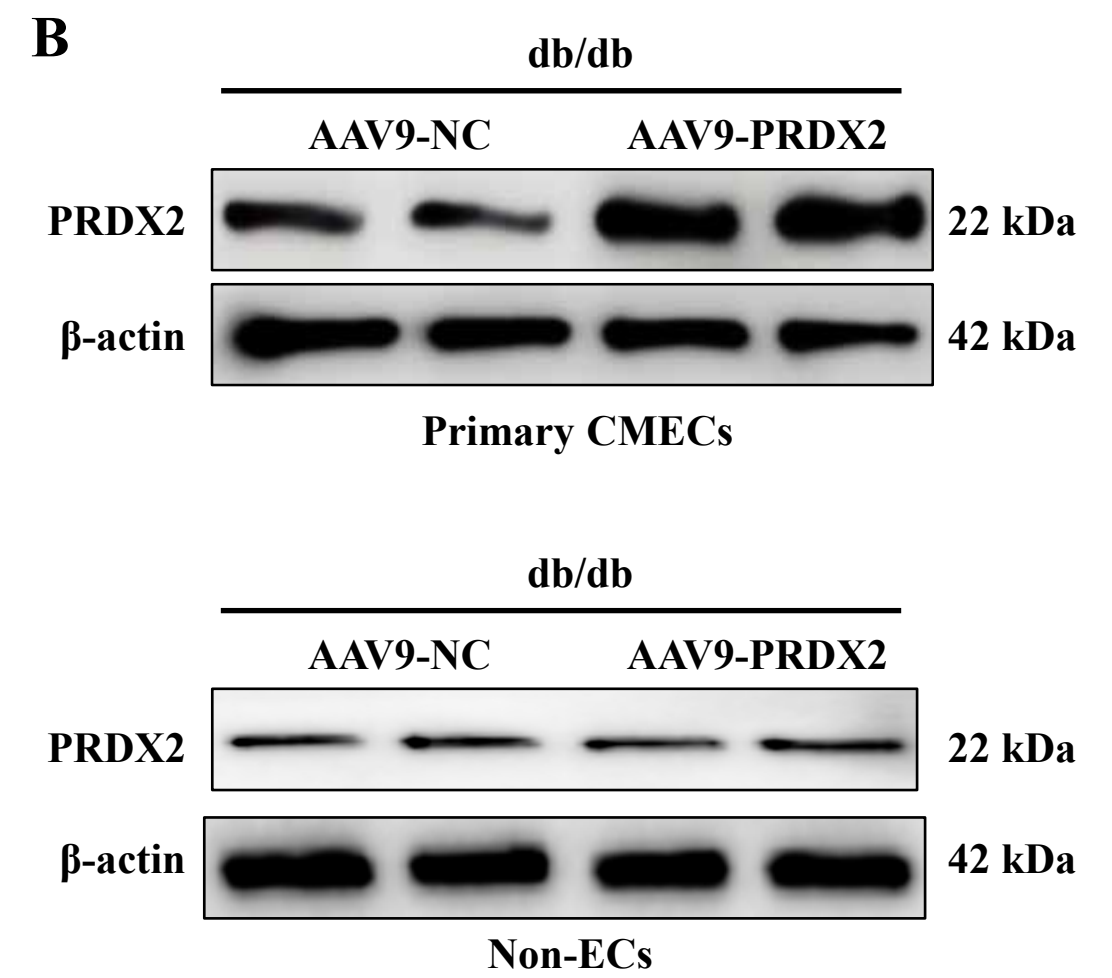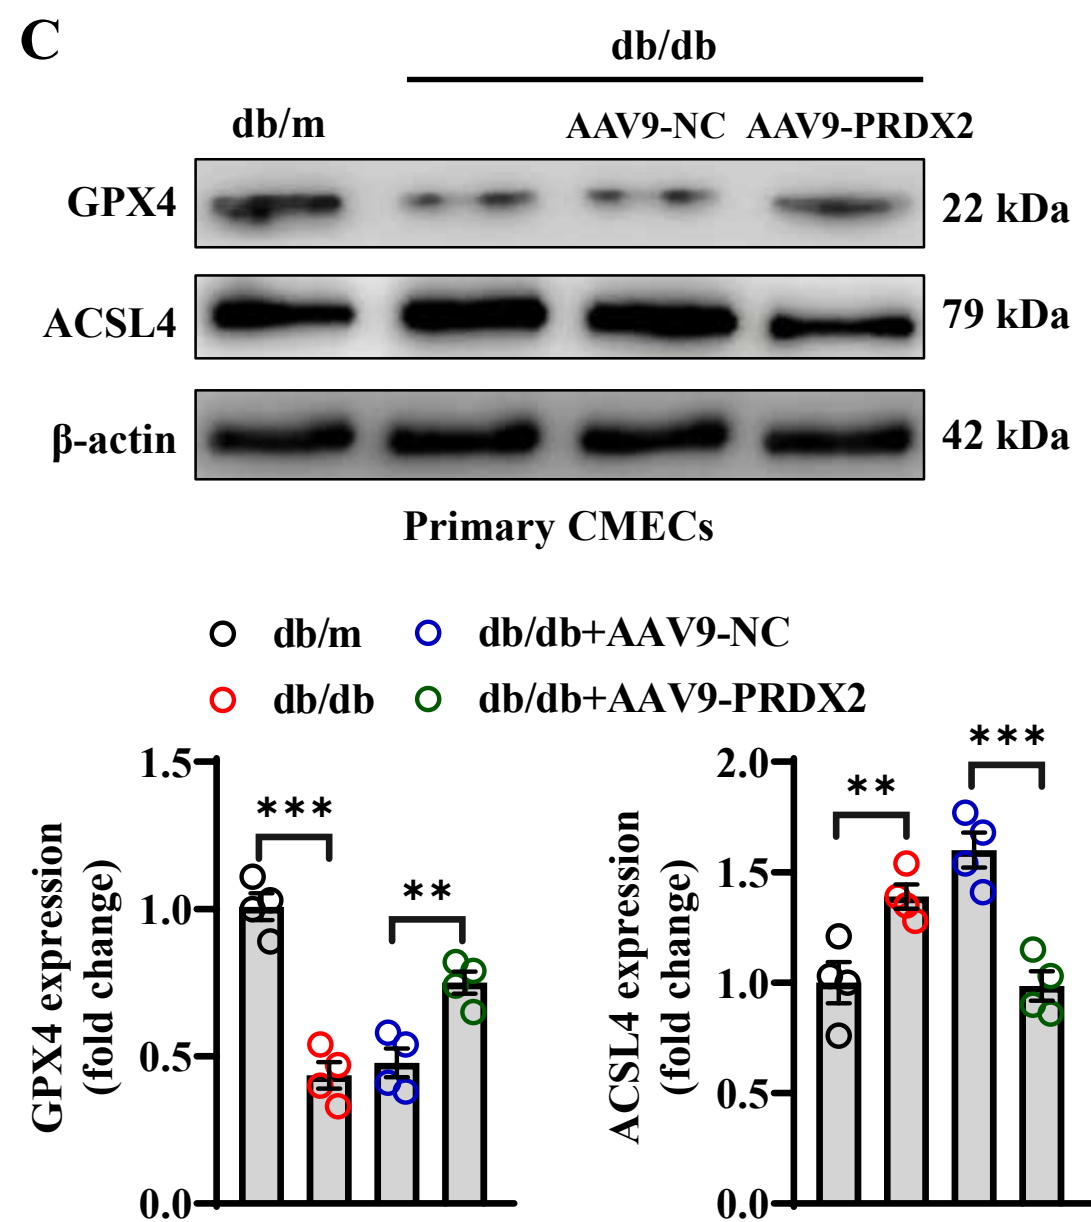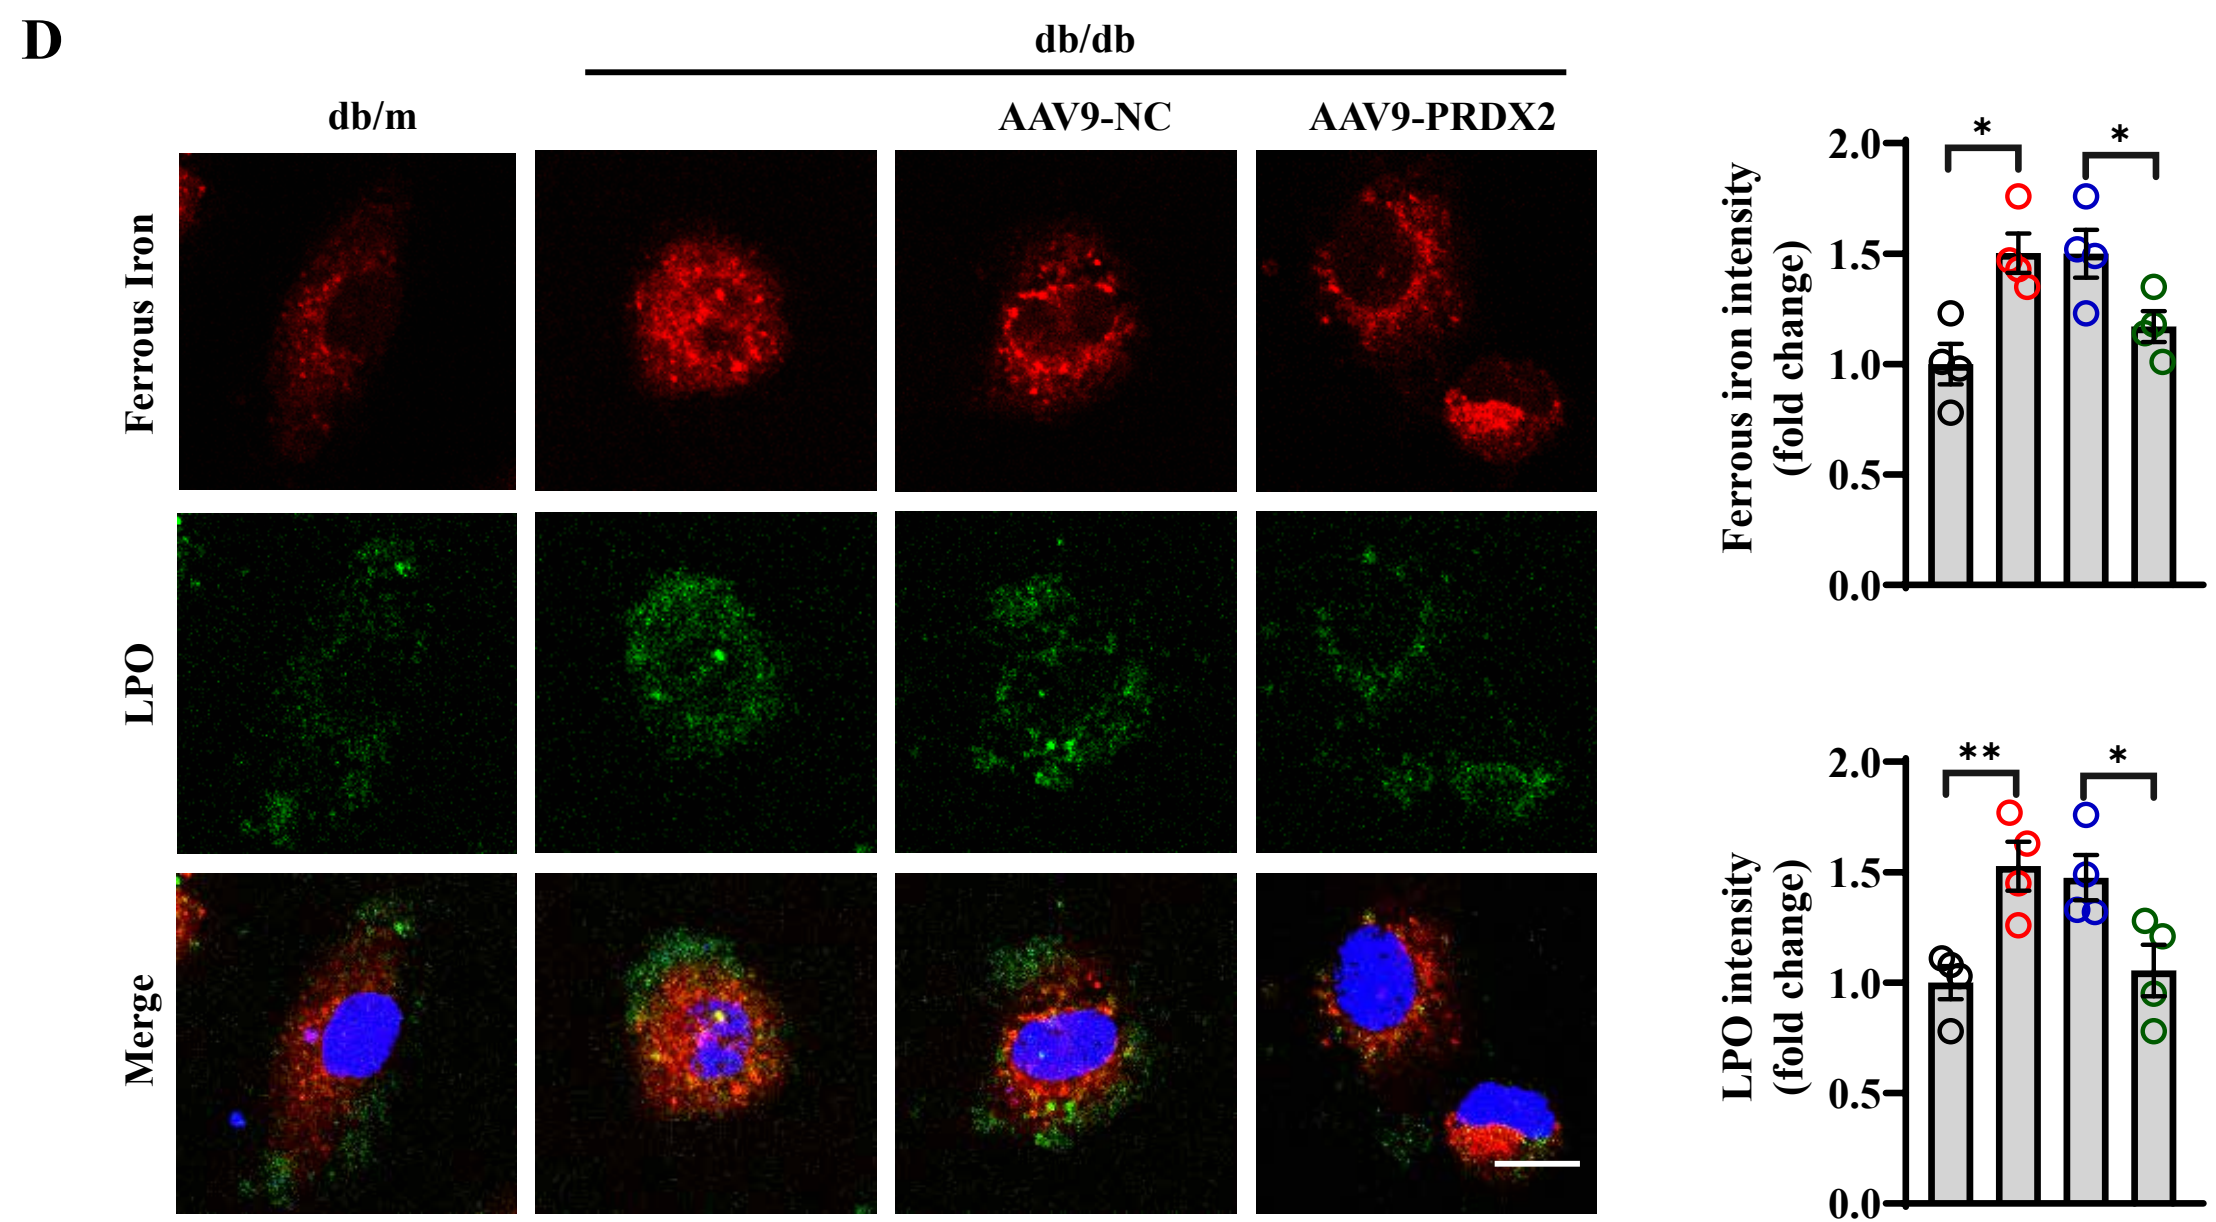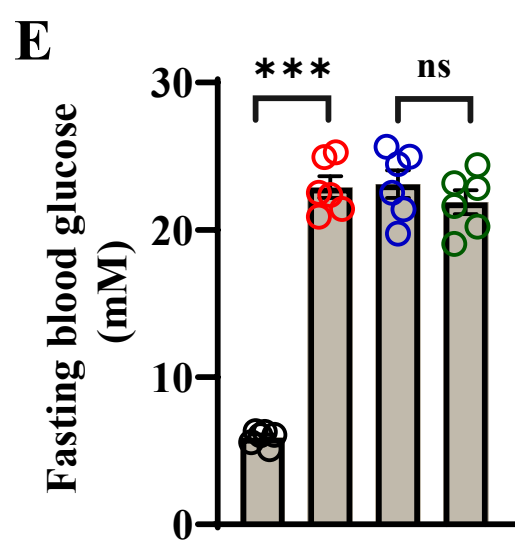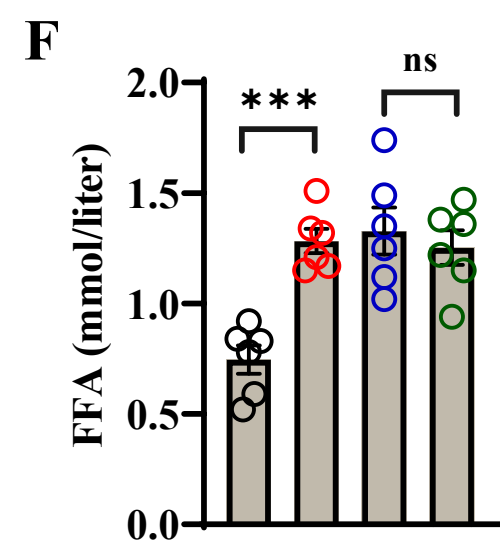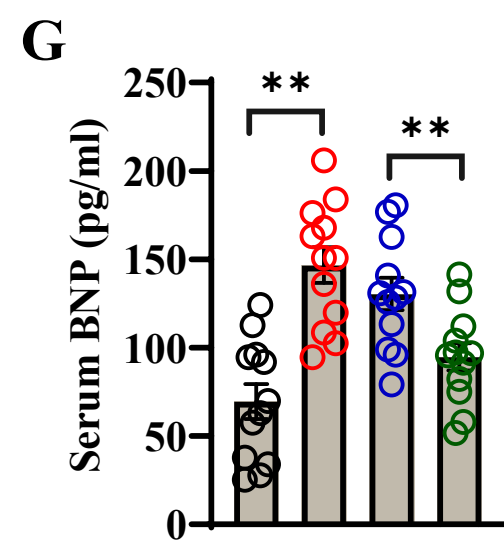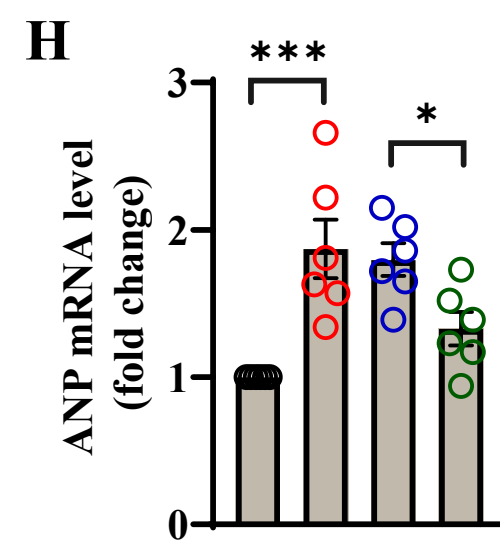

Supplement: Supplementary file 1 [file 1]

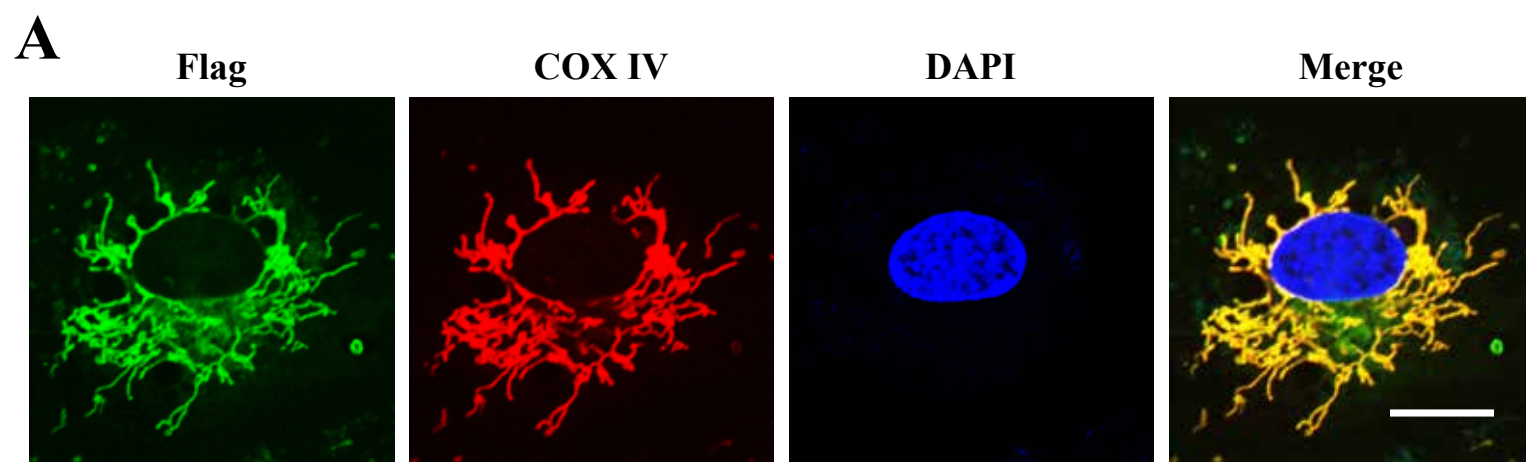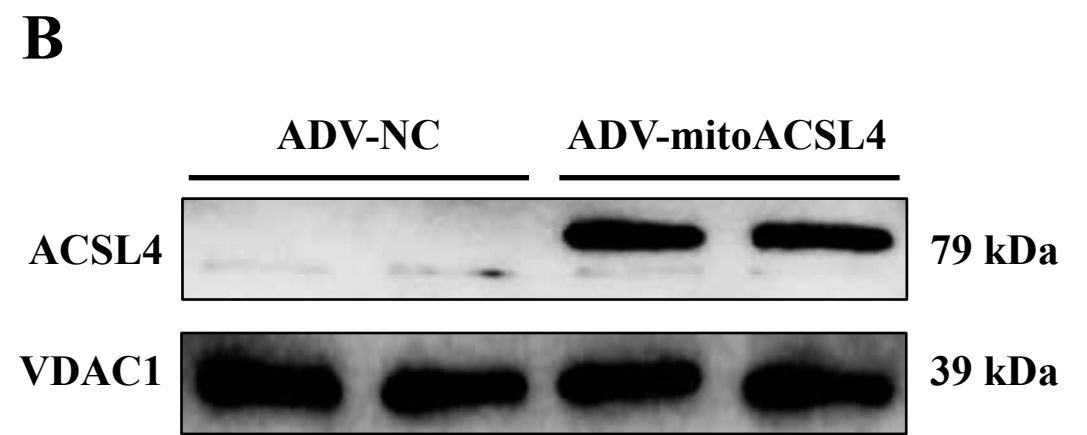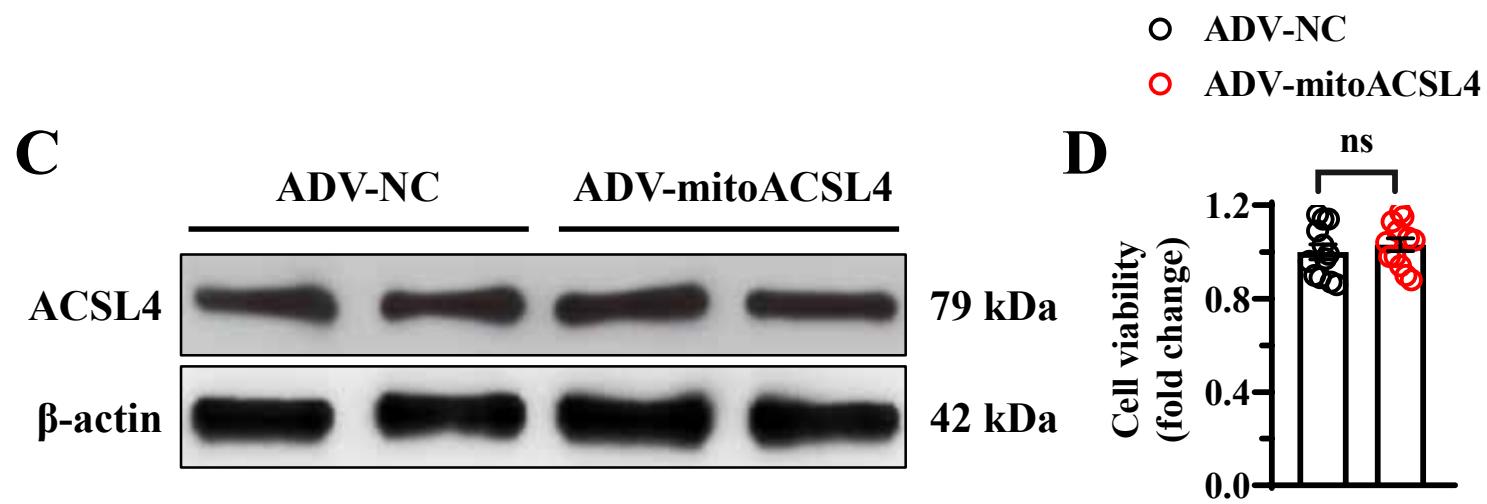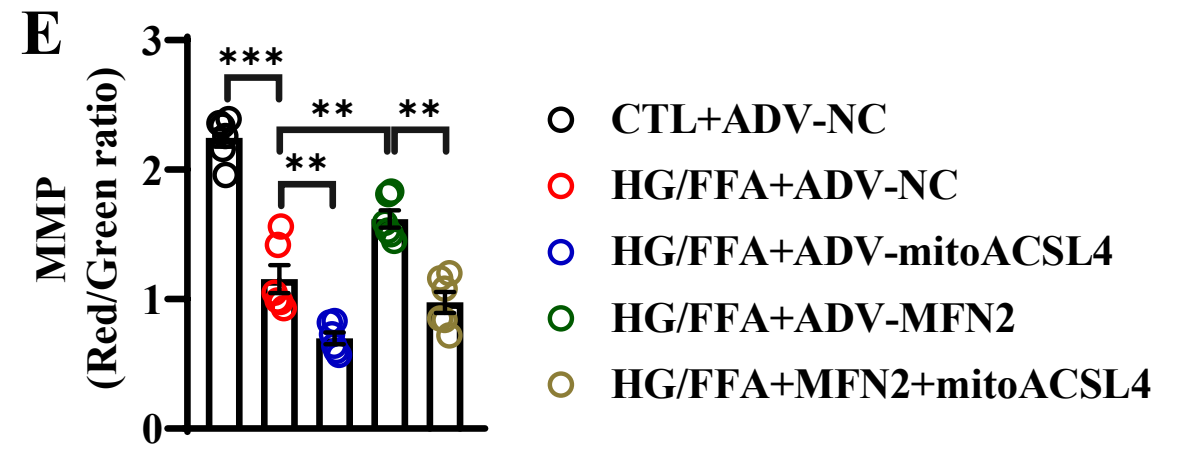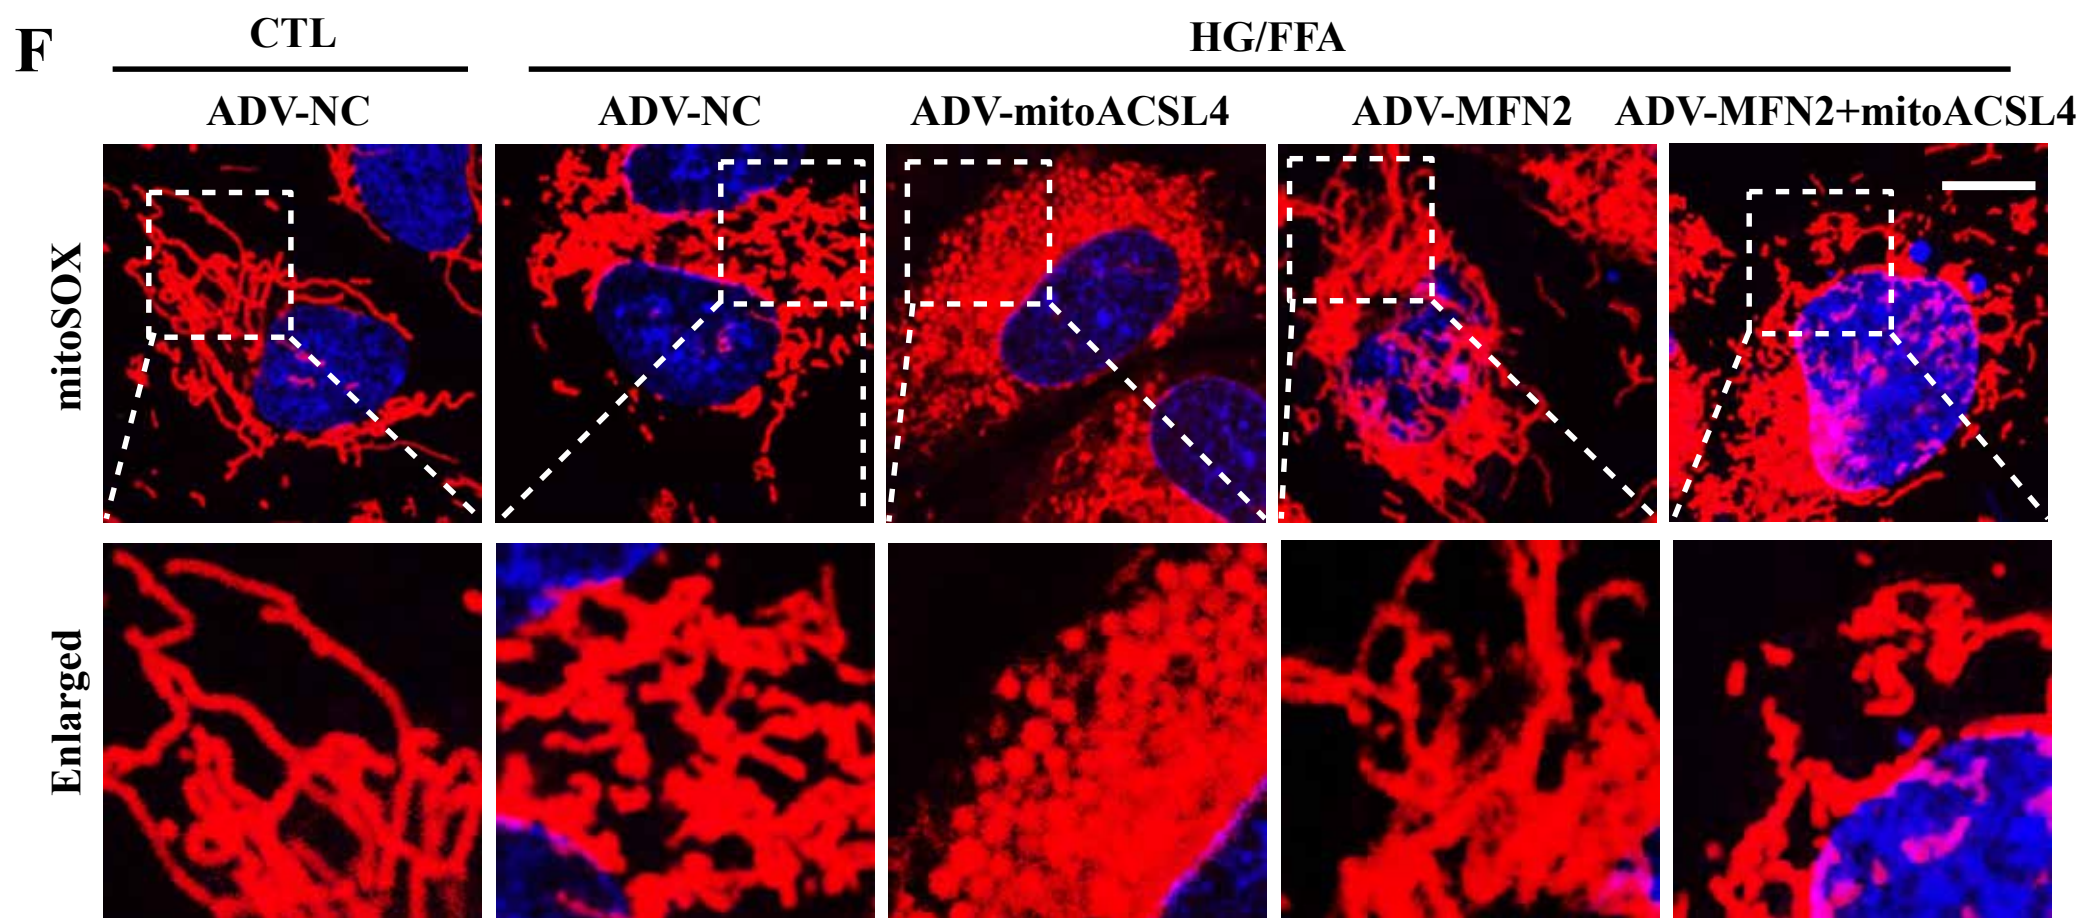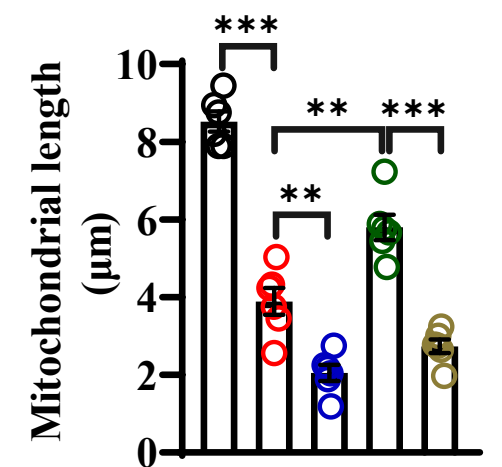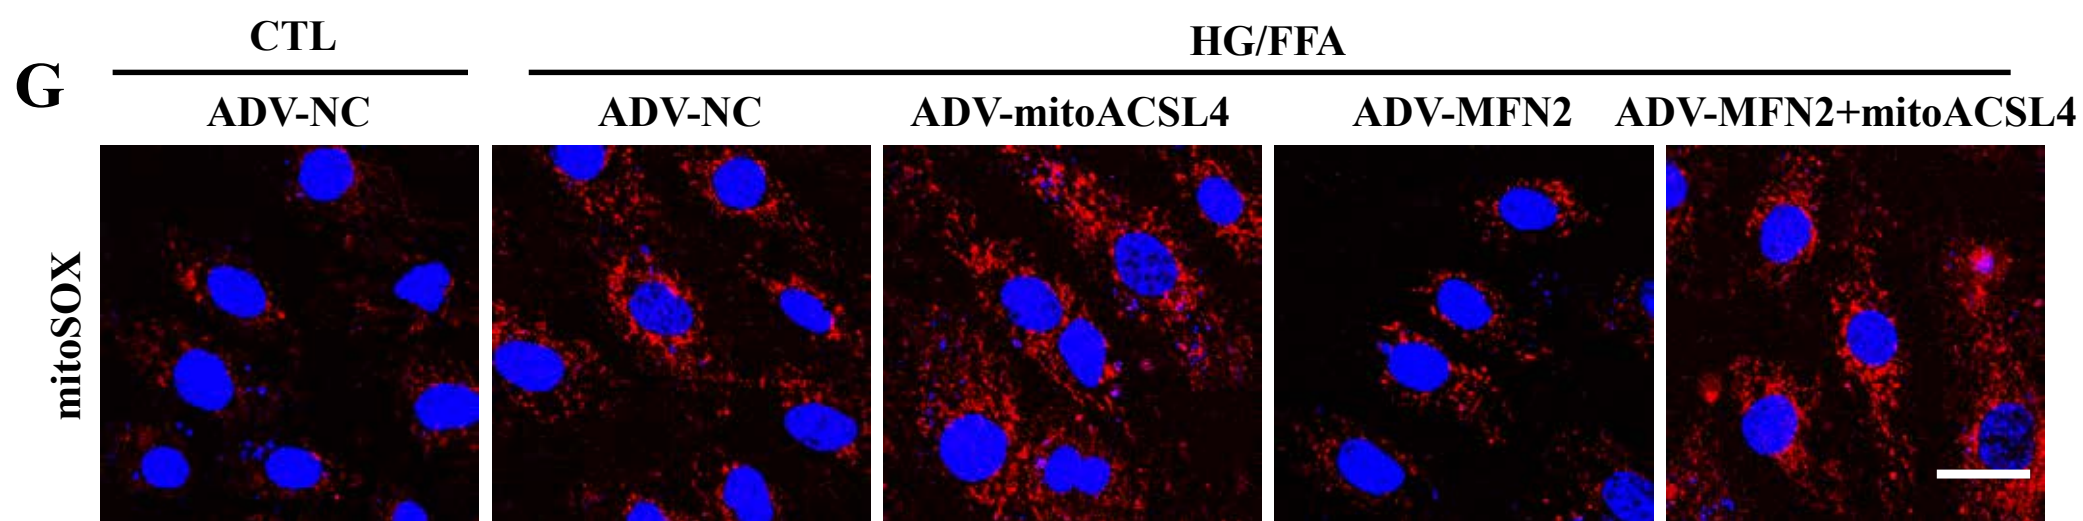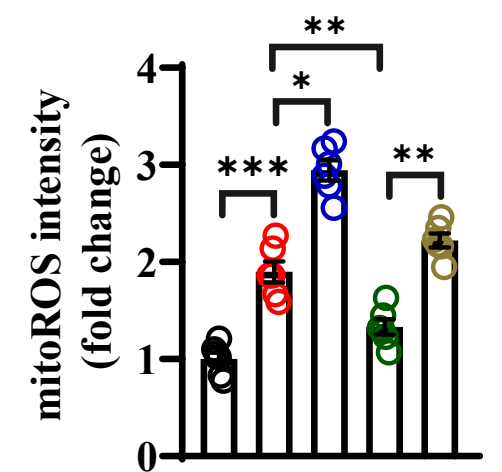

Supplement: Supplementary file 2 [file 1]

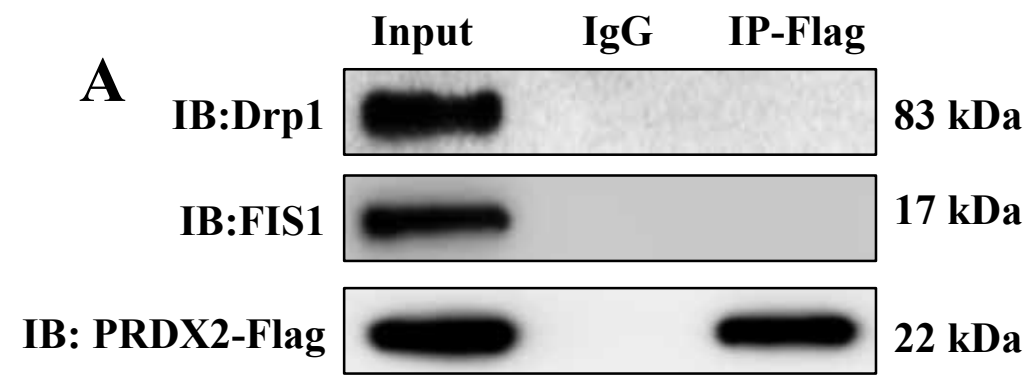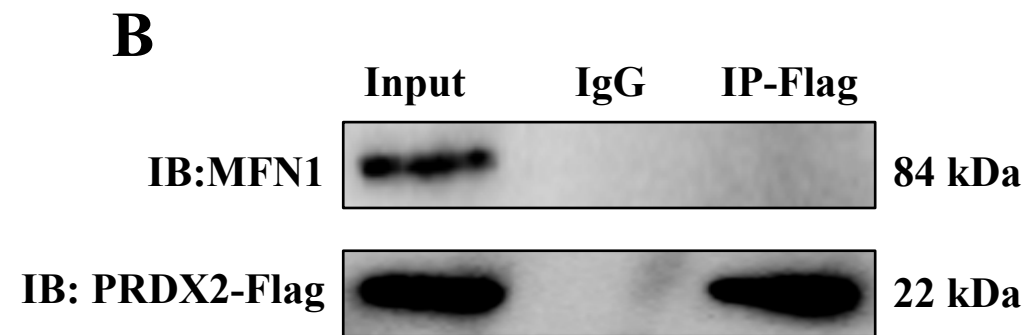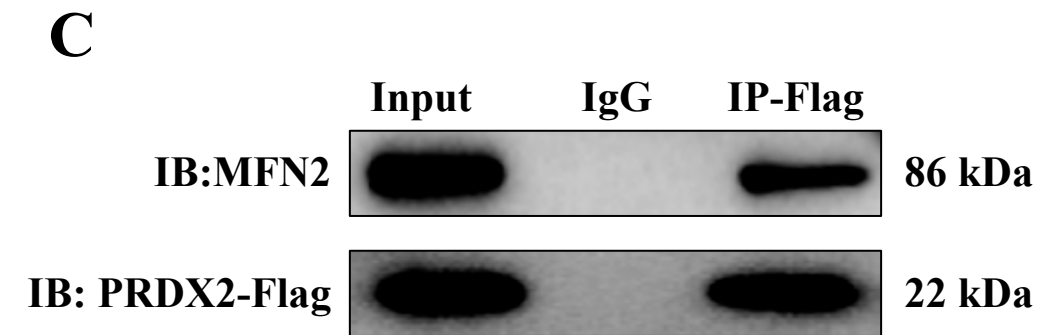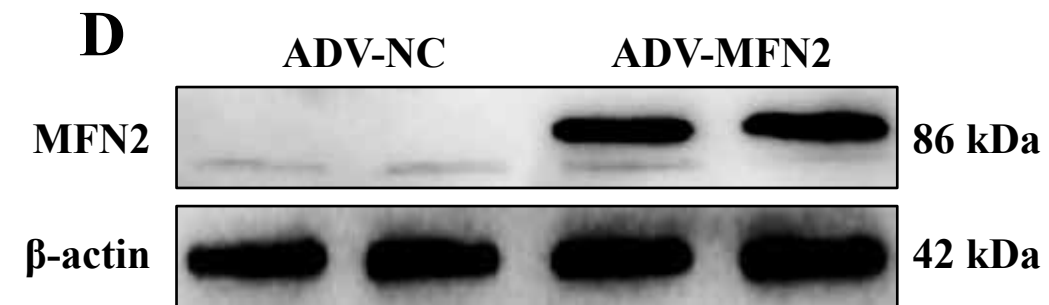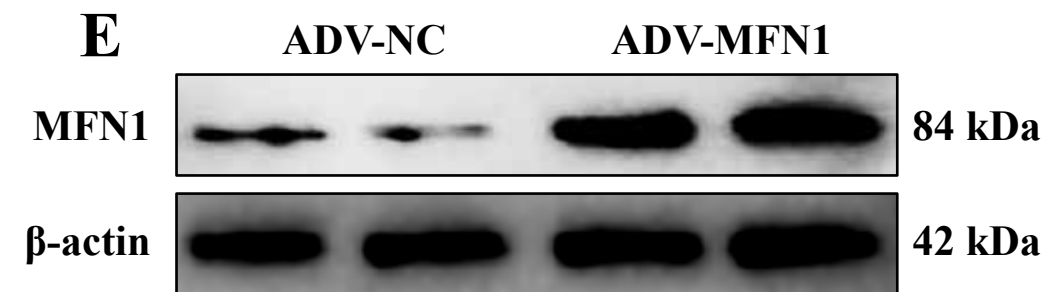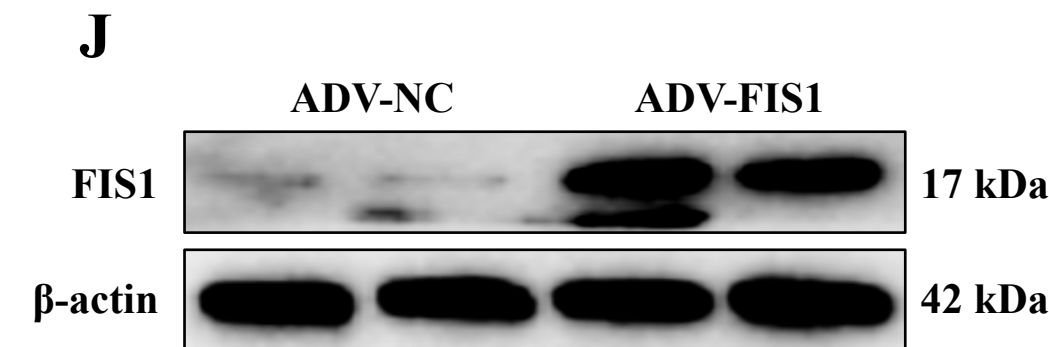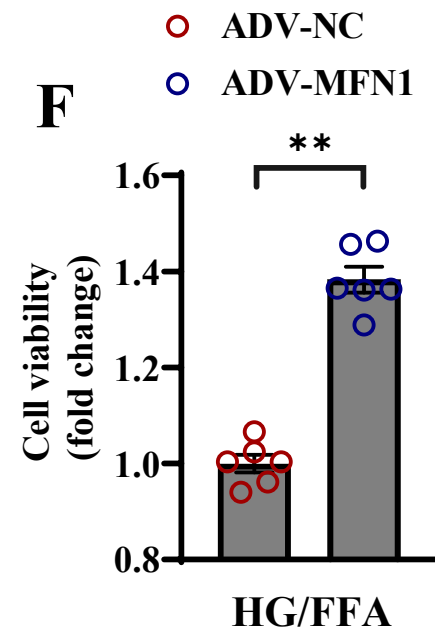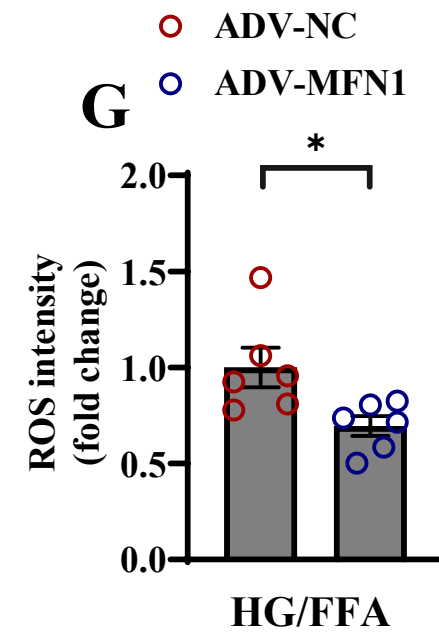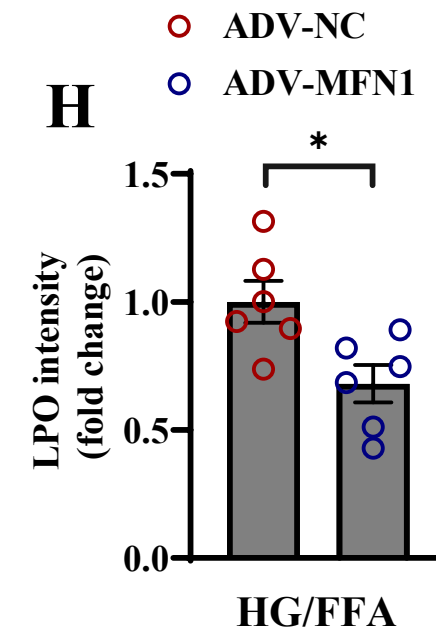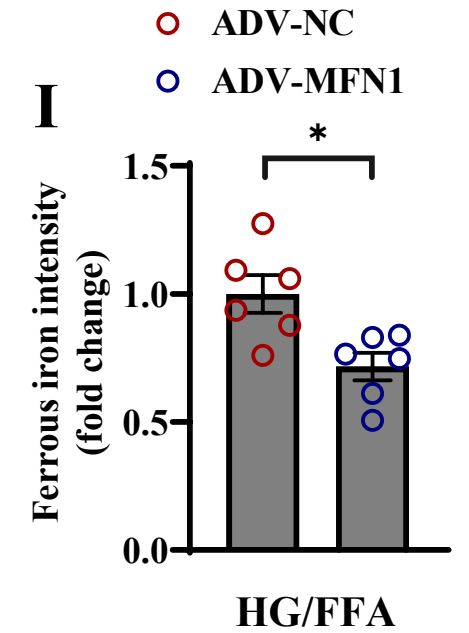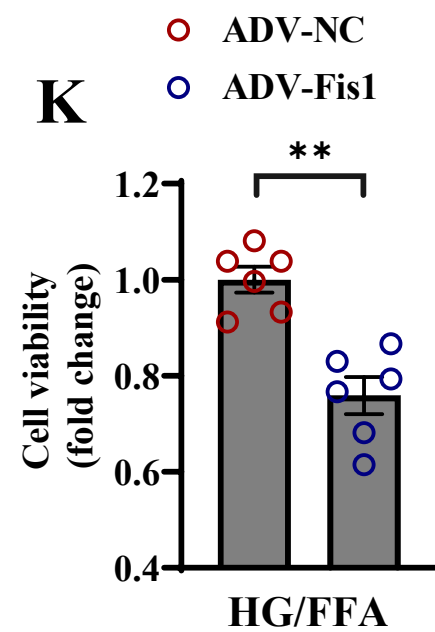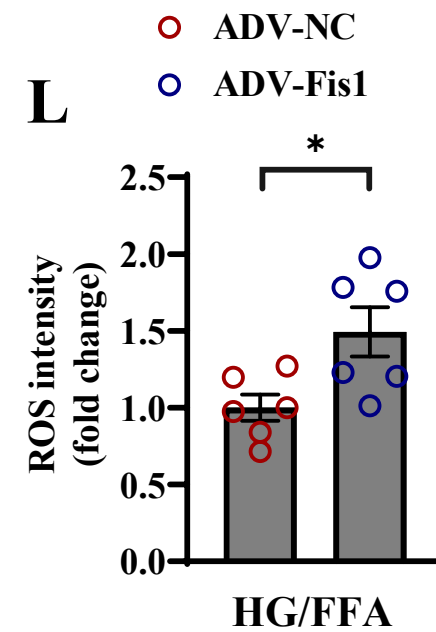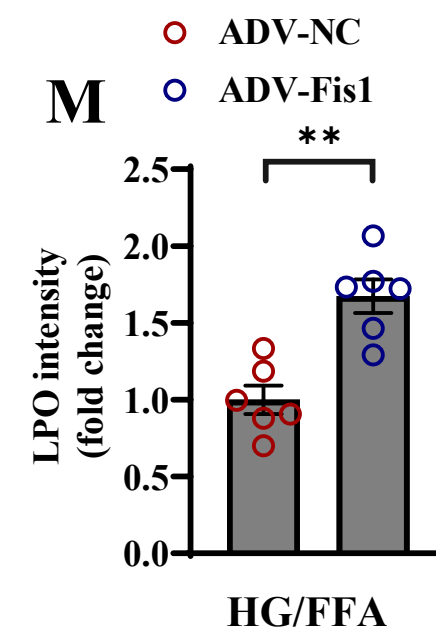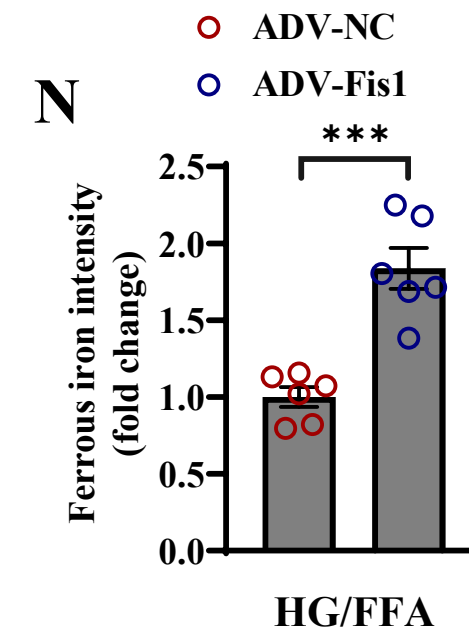

Supplement: Supplementary file 3 [file 1]

**A**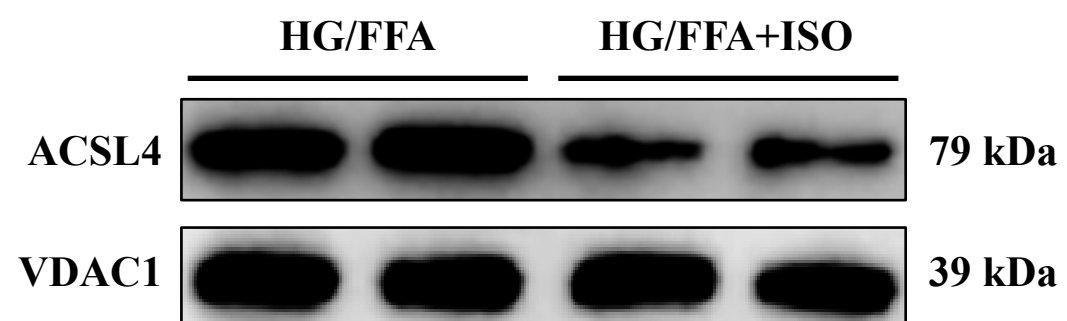**B**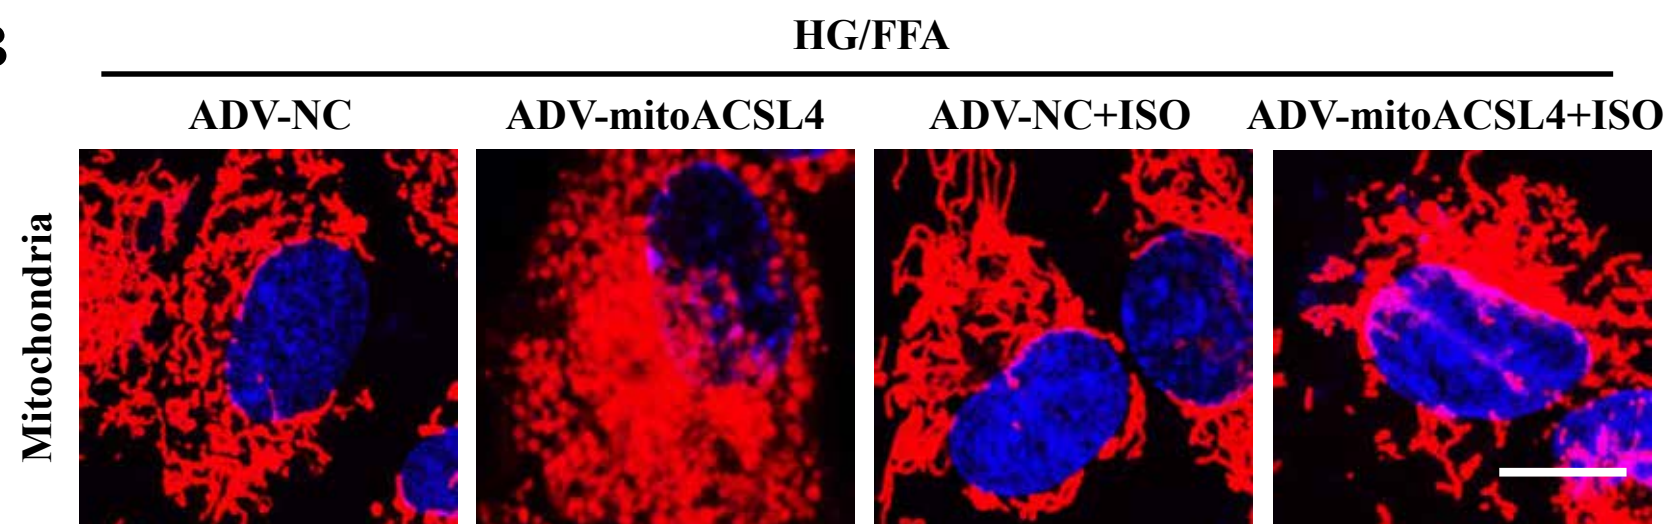**C**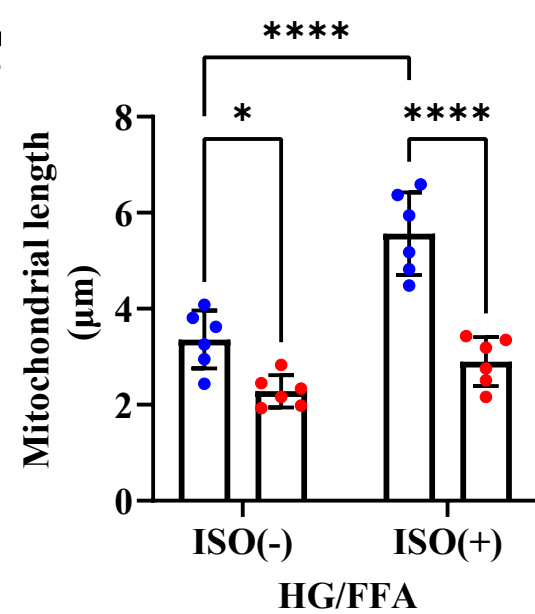**D**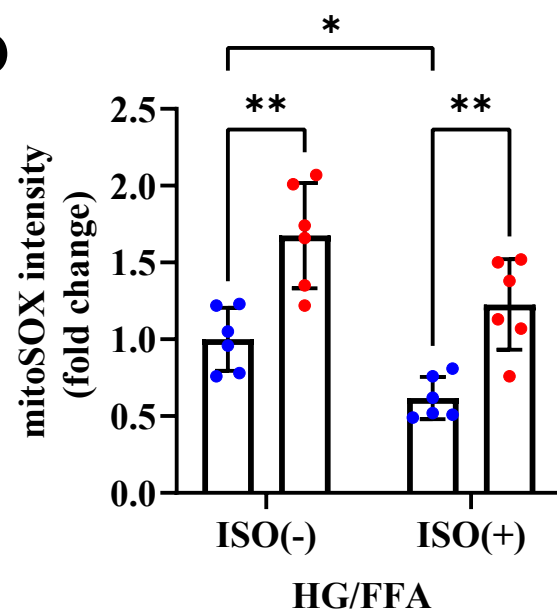**E**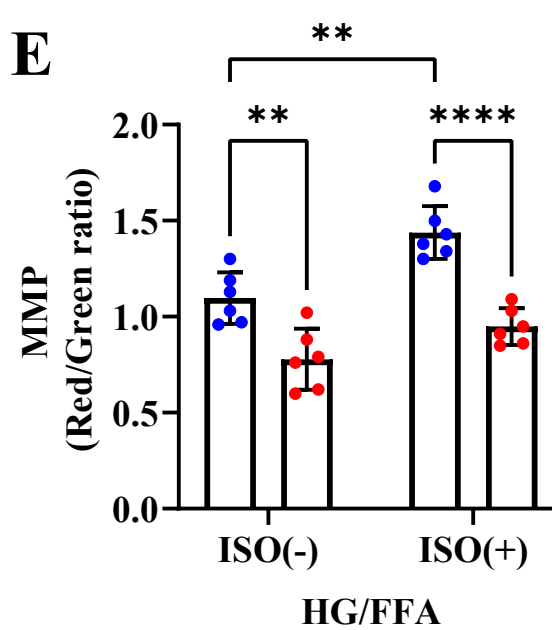**F**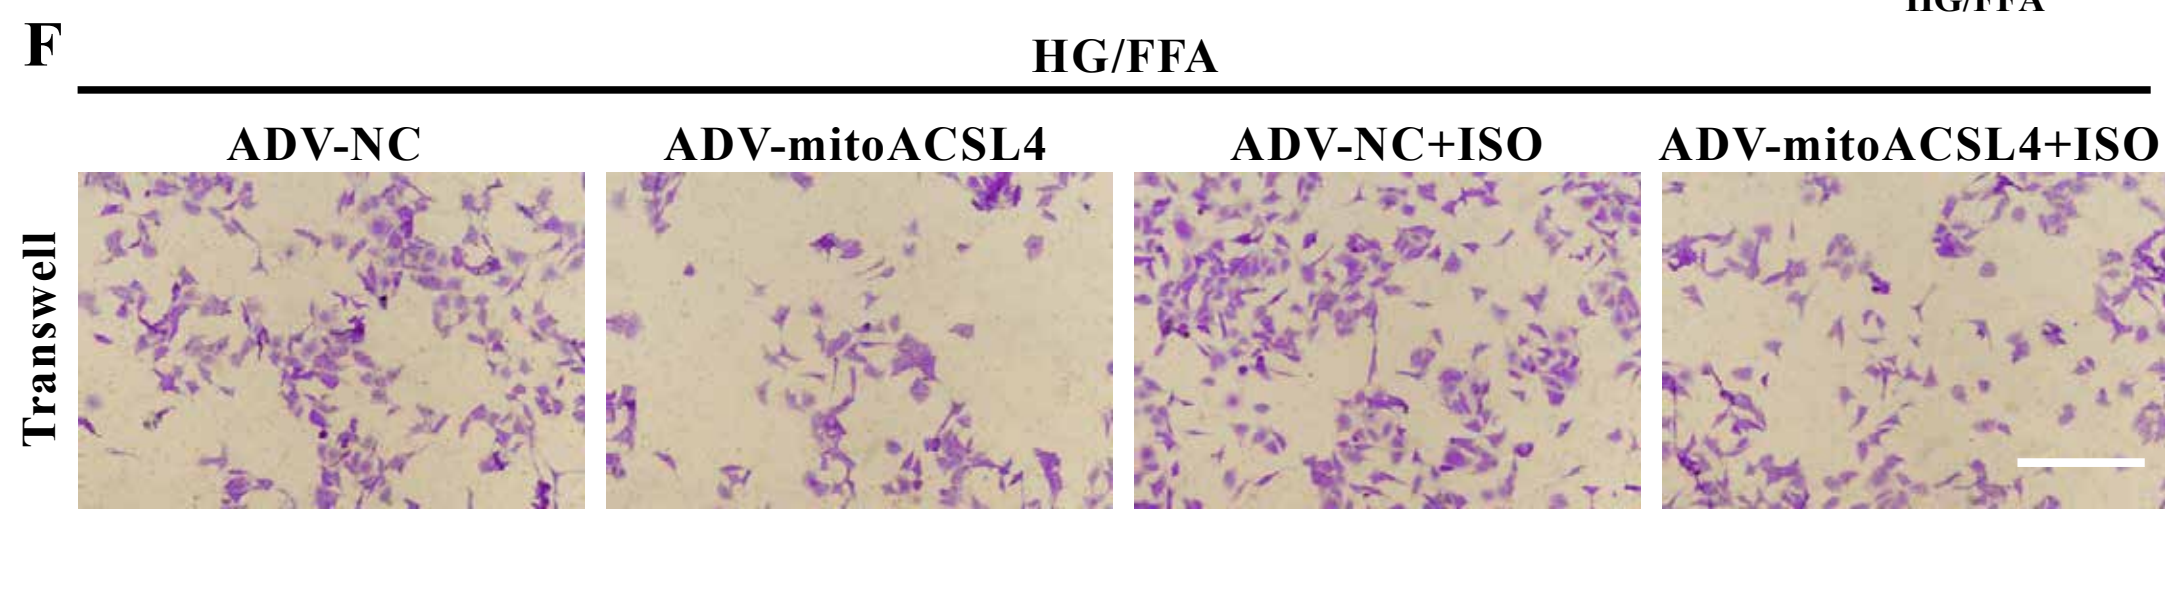**G**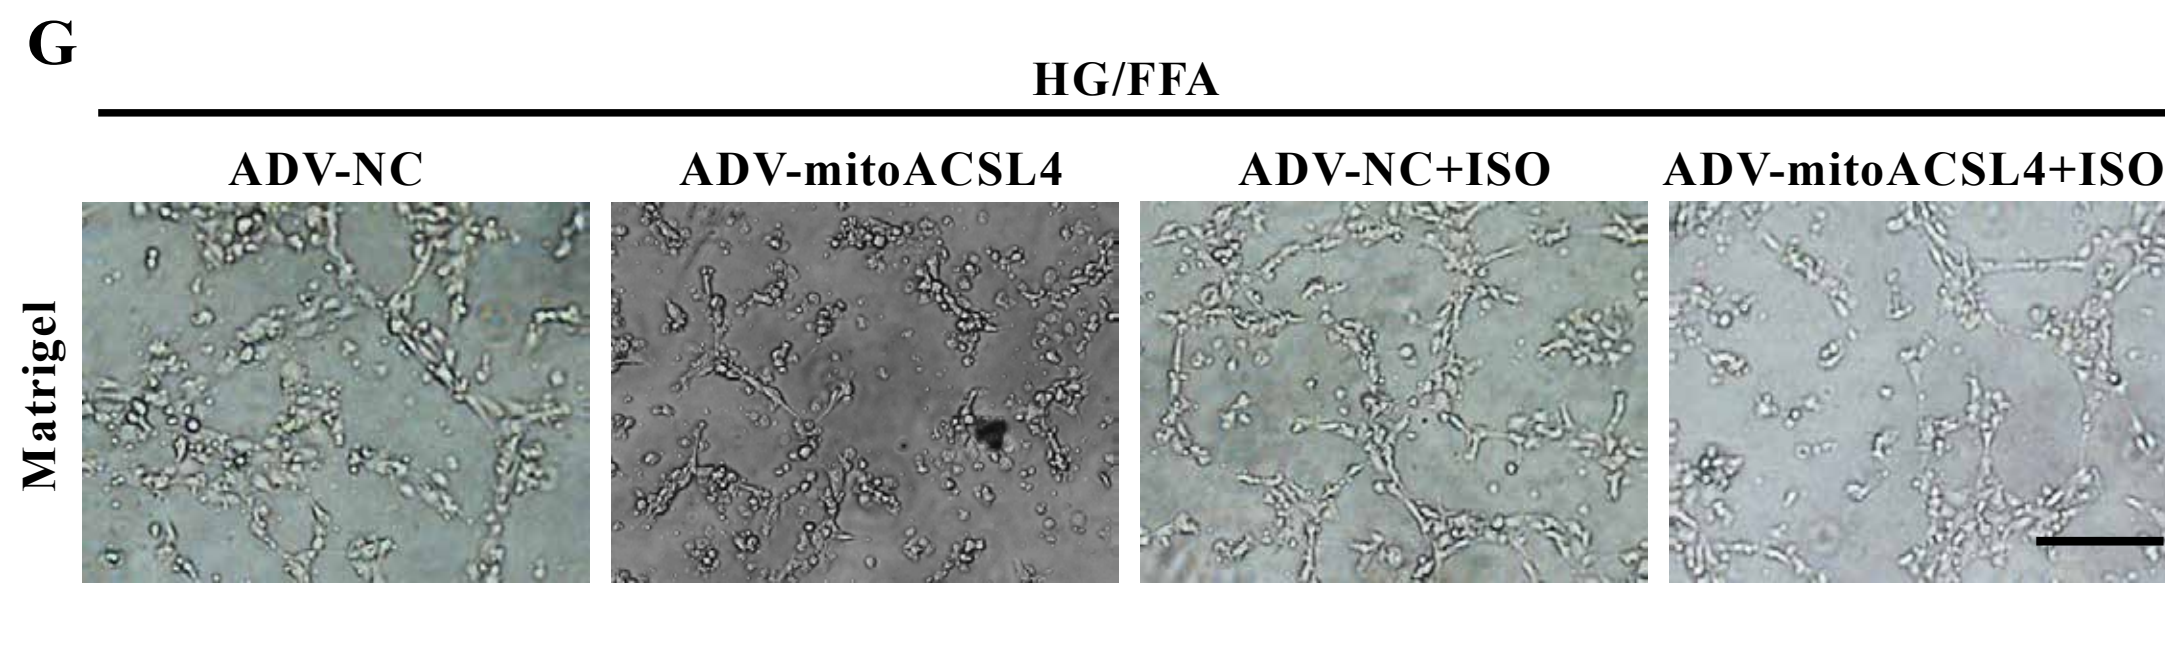**H**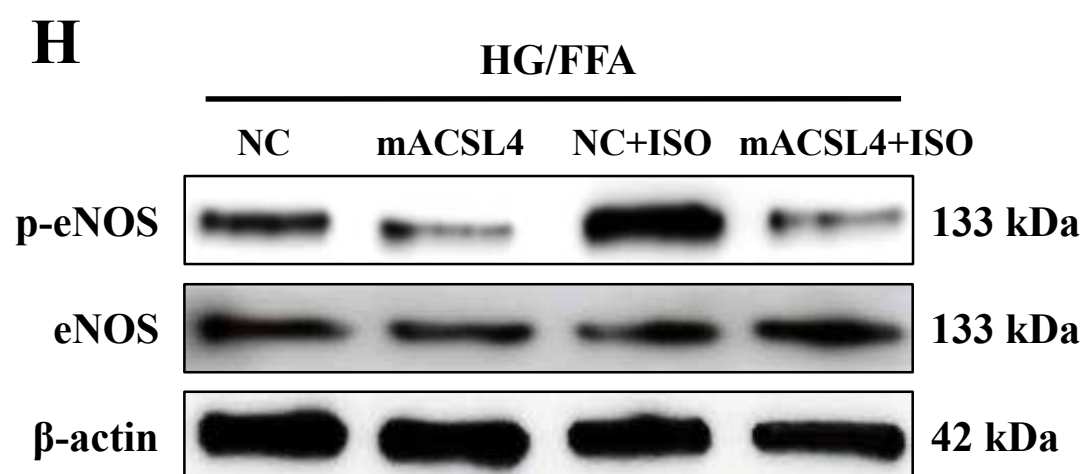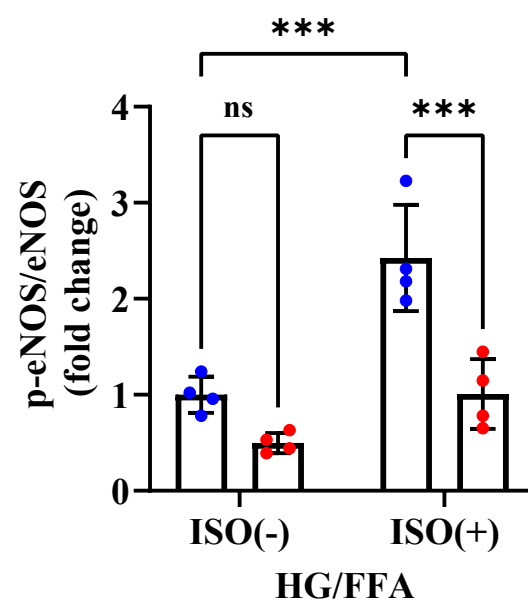**I**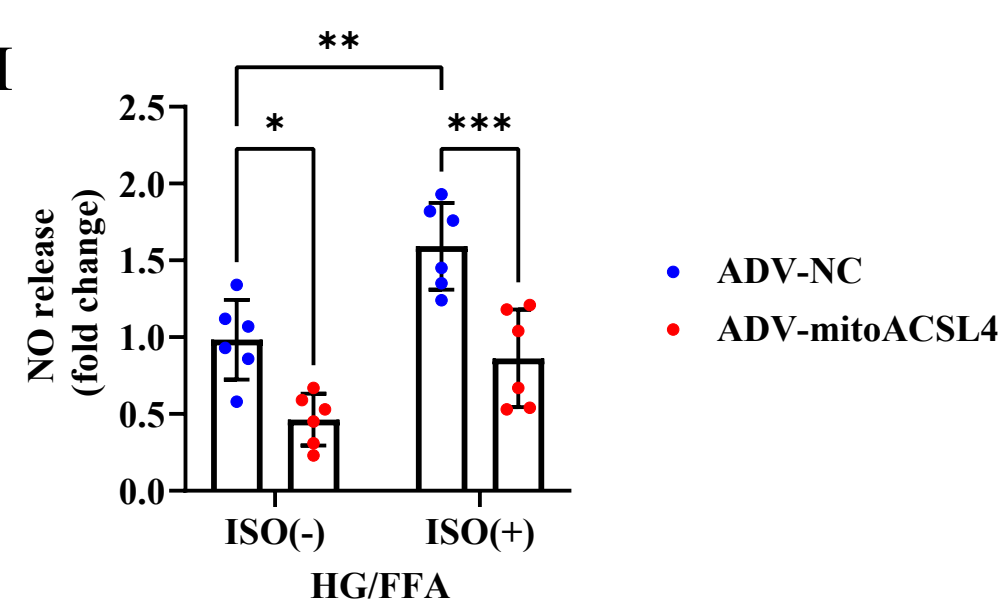

Supplement: Supplementary file 4 [file 1]

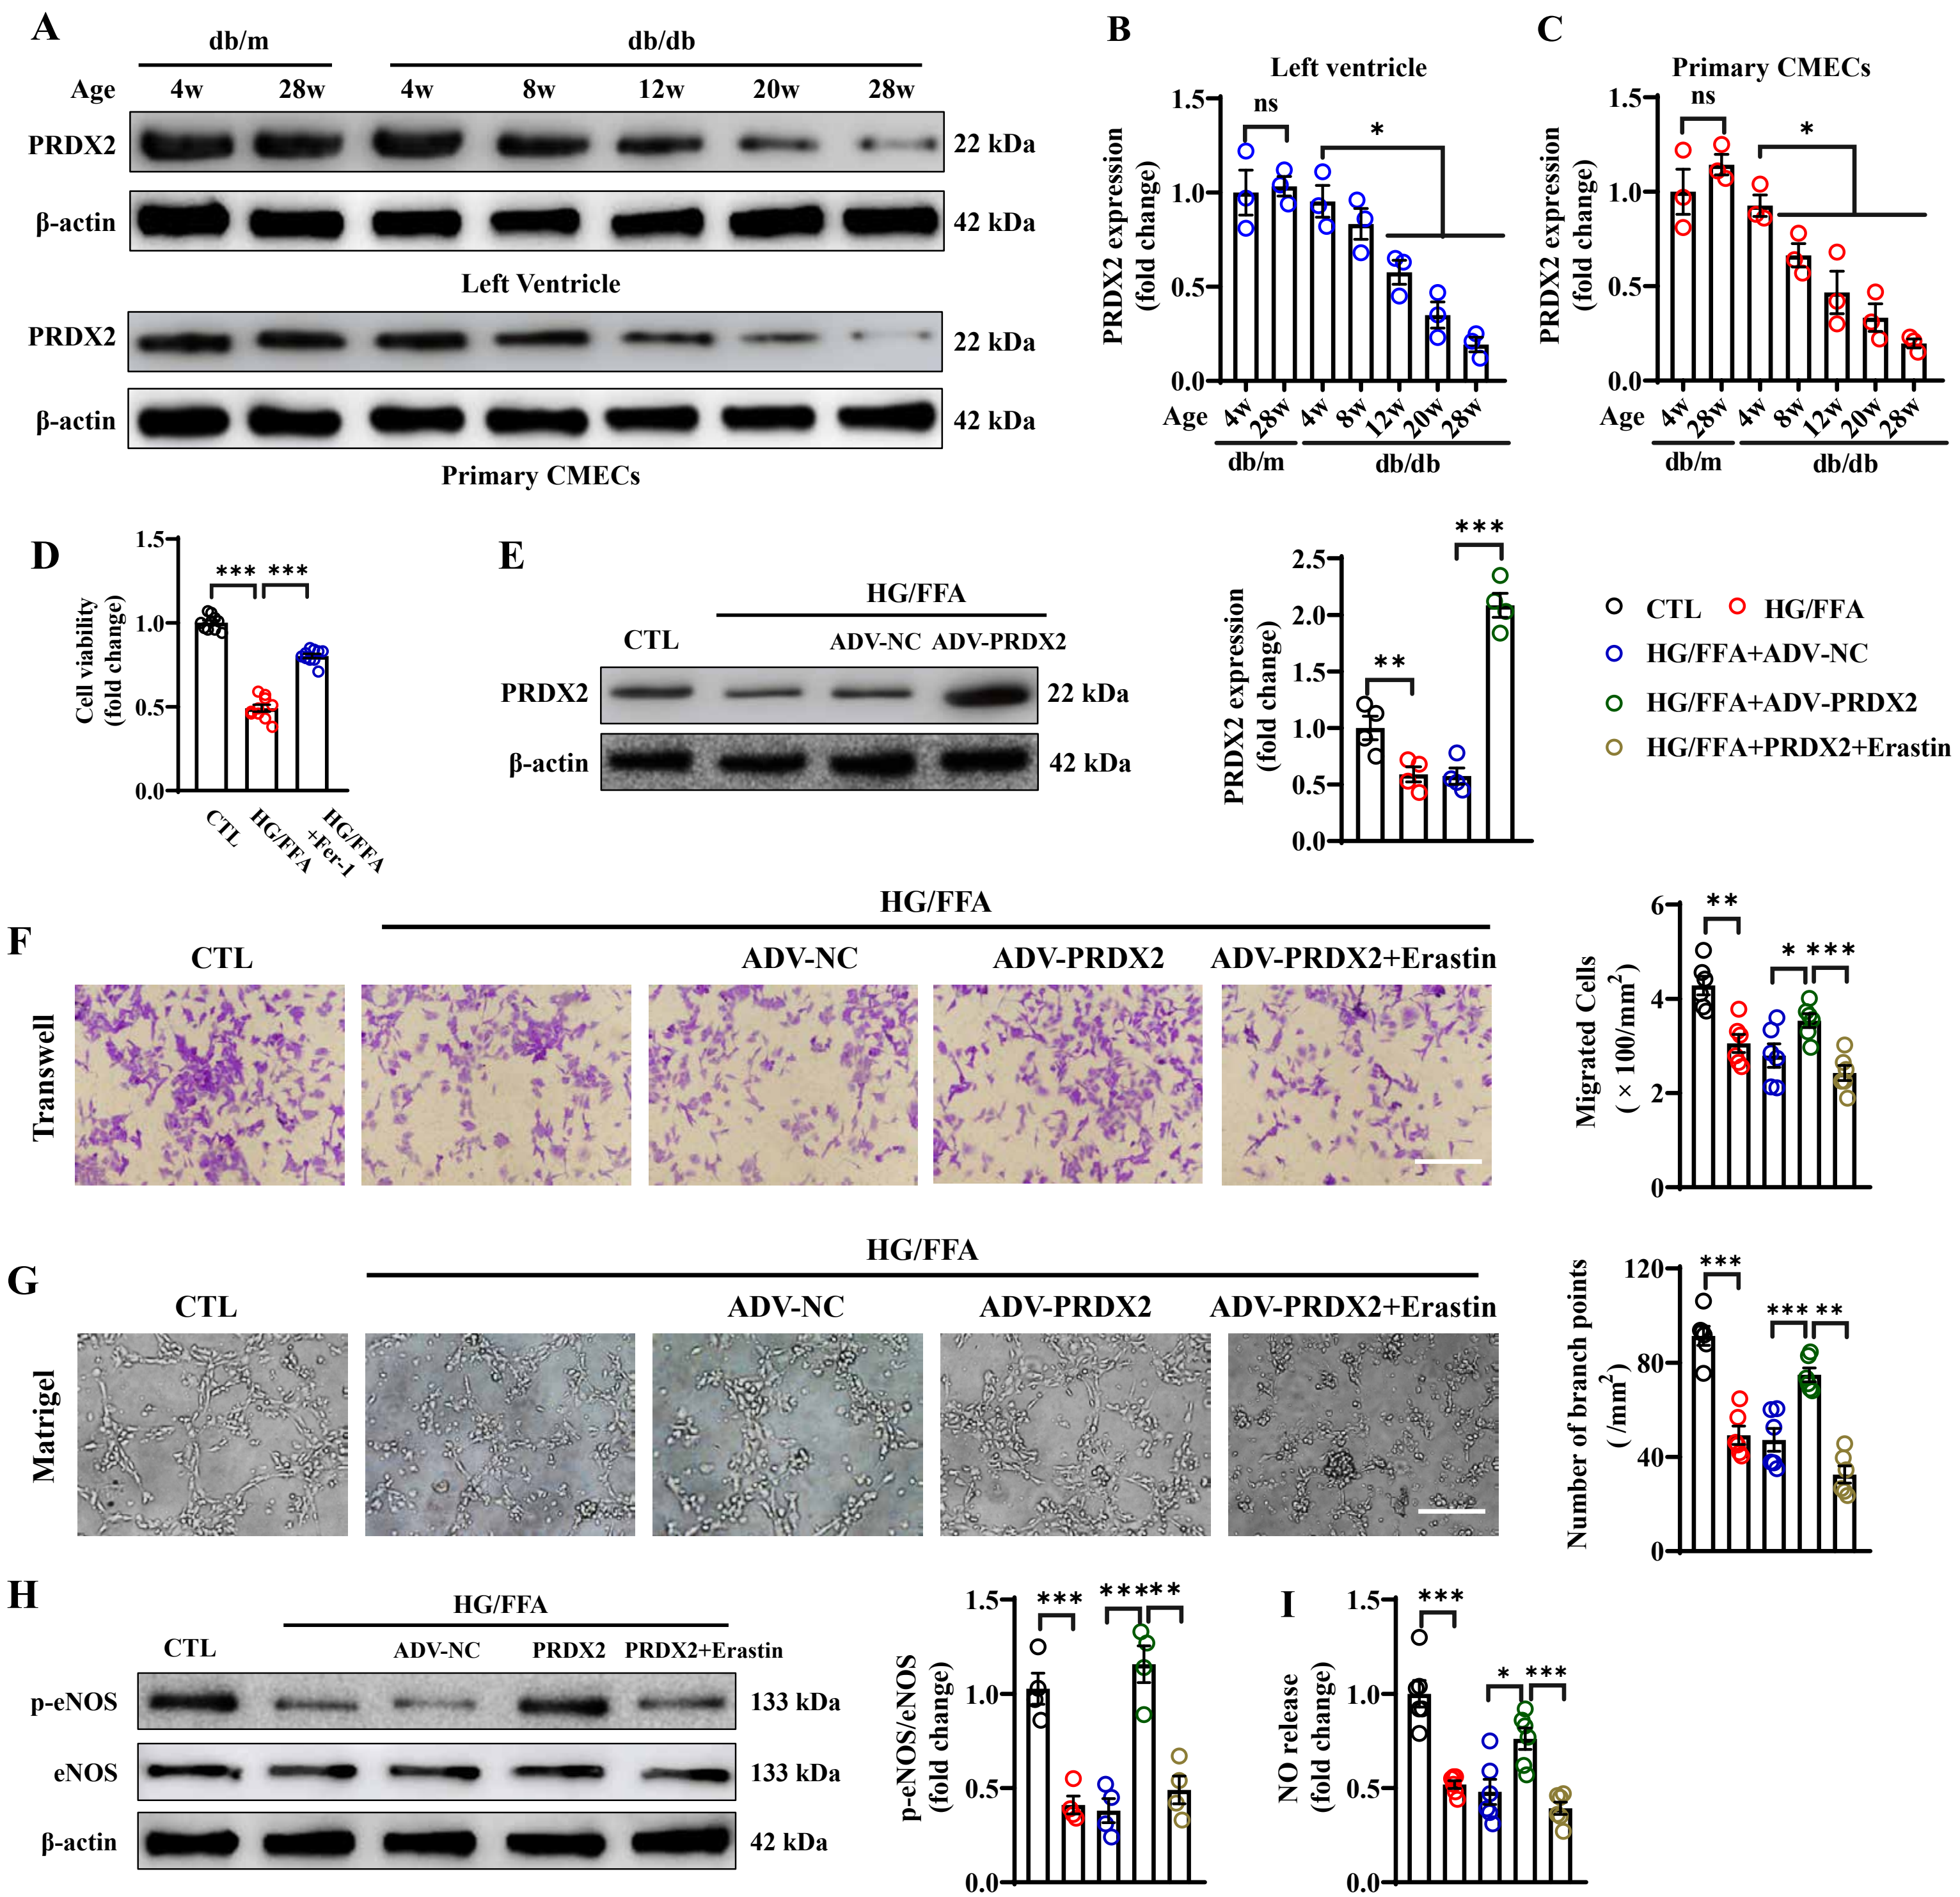

Supplement: Supplementary file 5 [file 1]

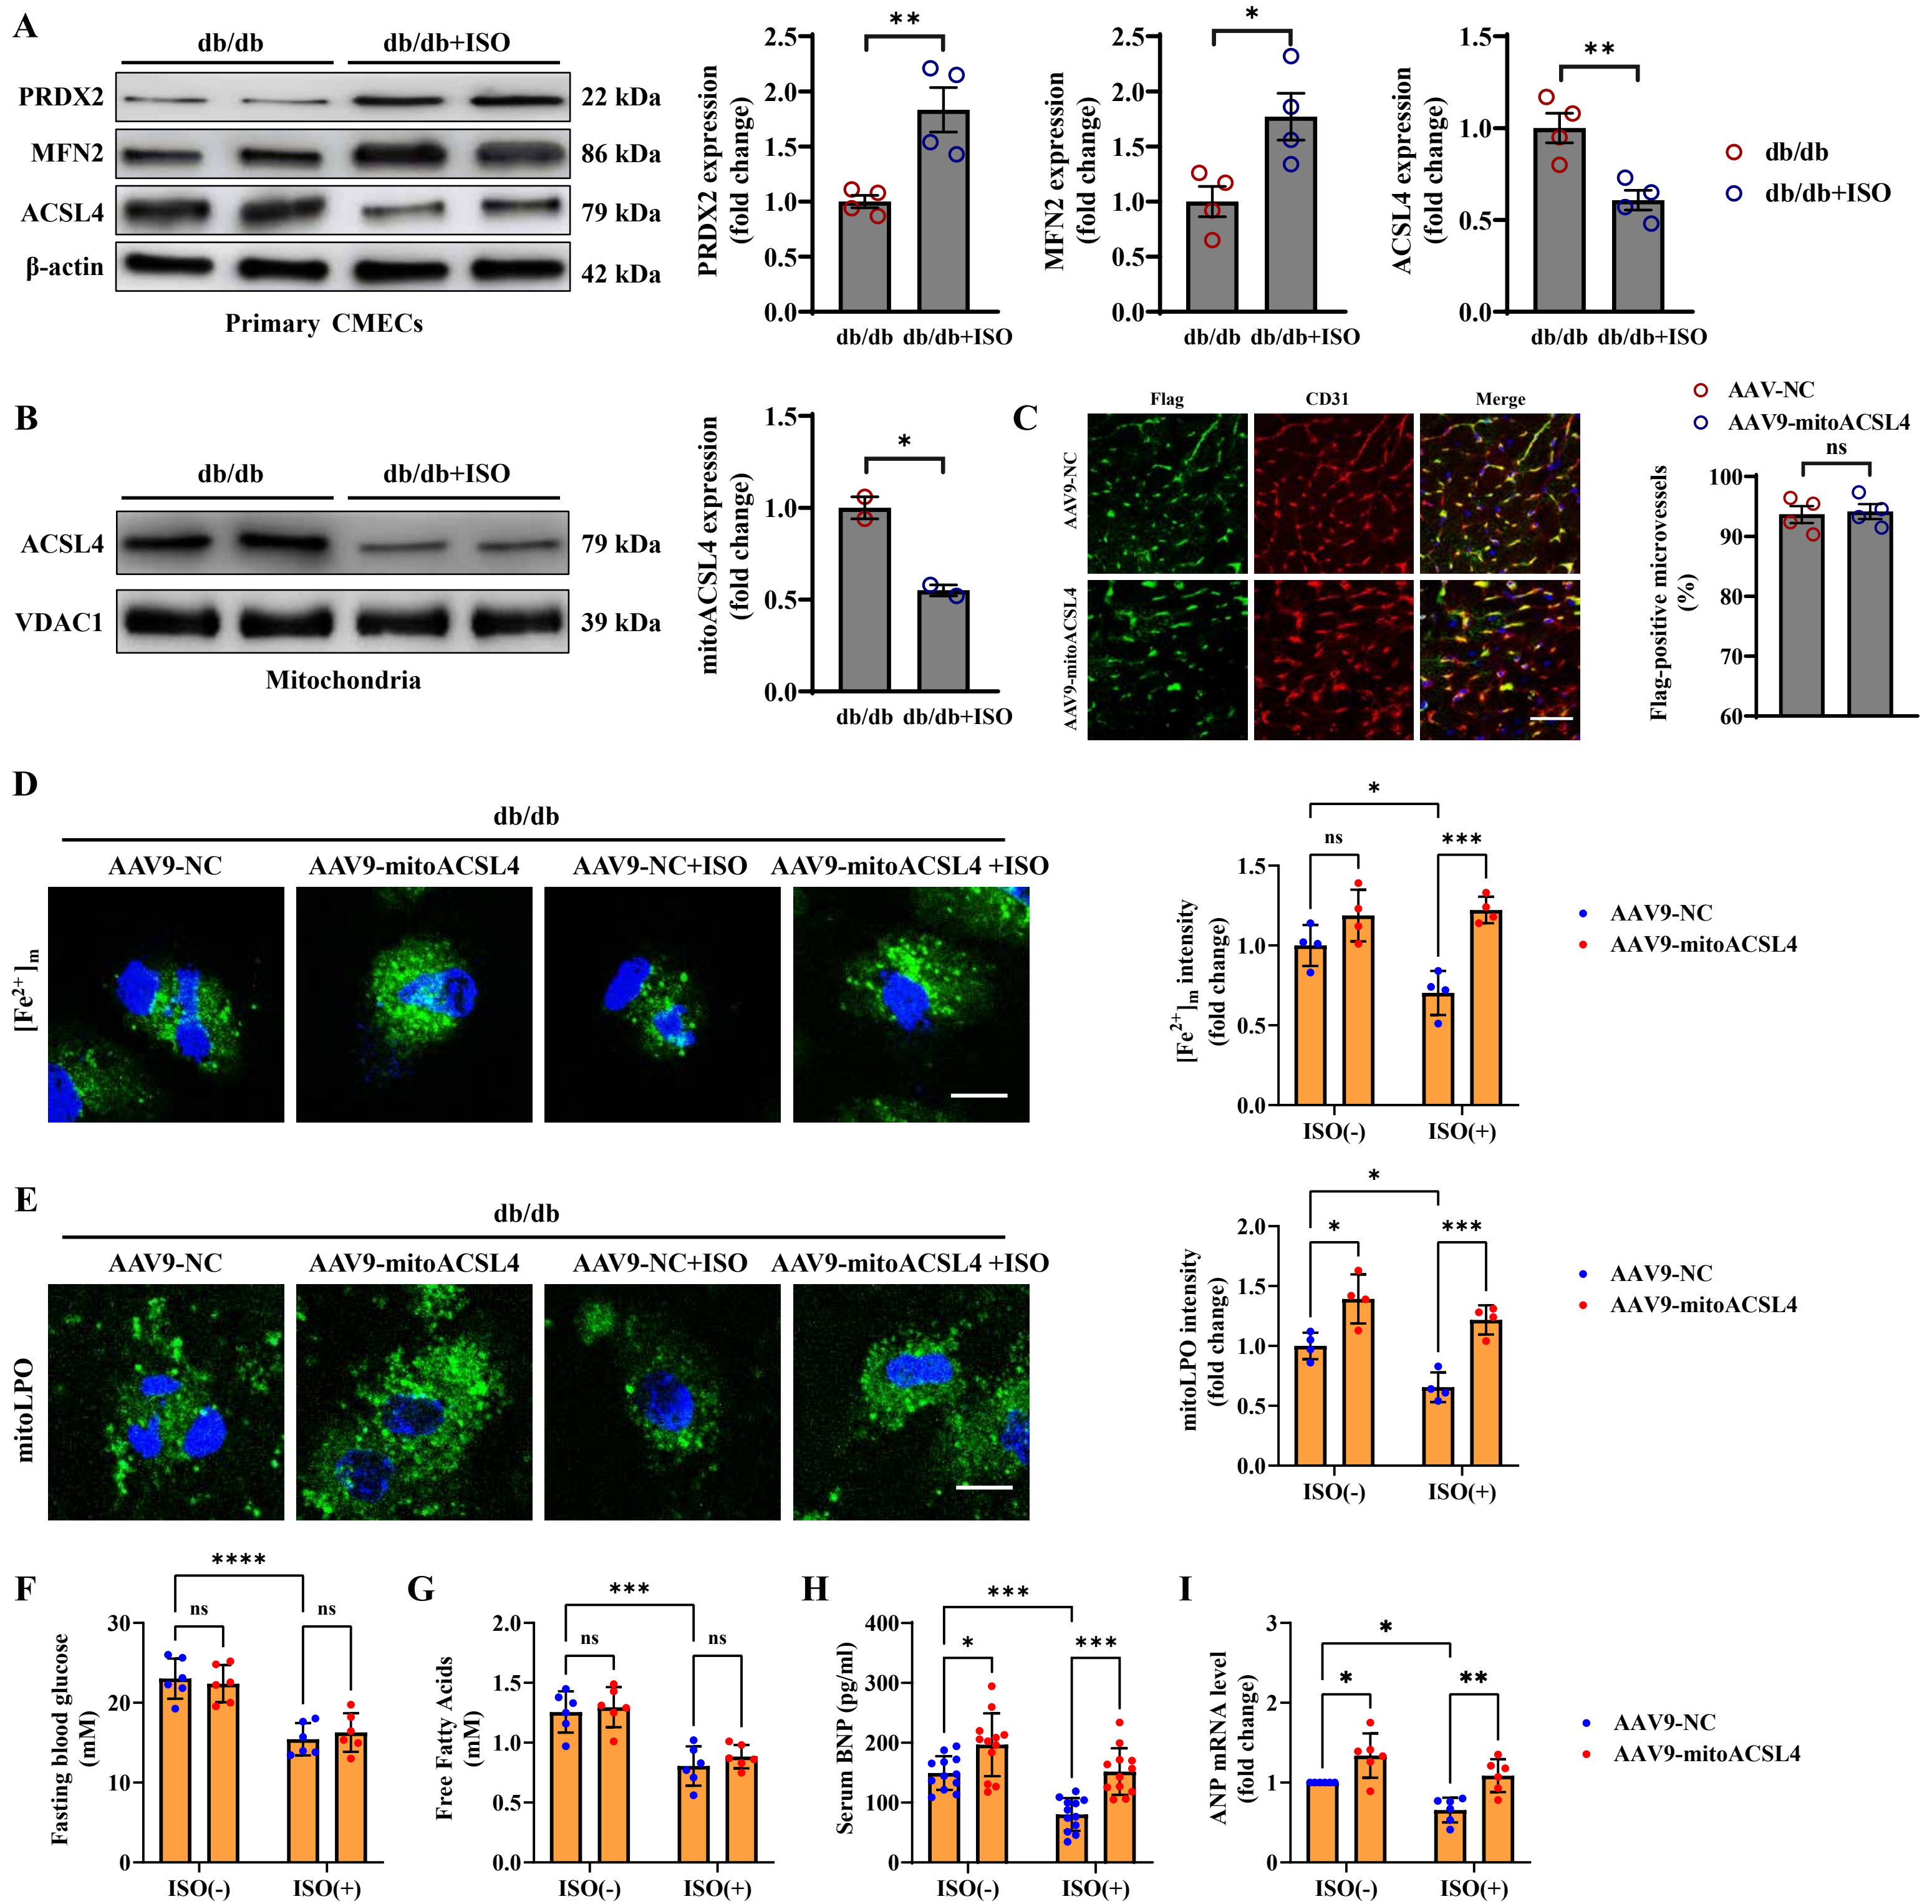

Supplement: Supplementary file 6 [file 1]

**A**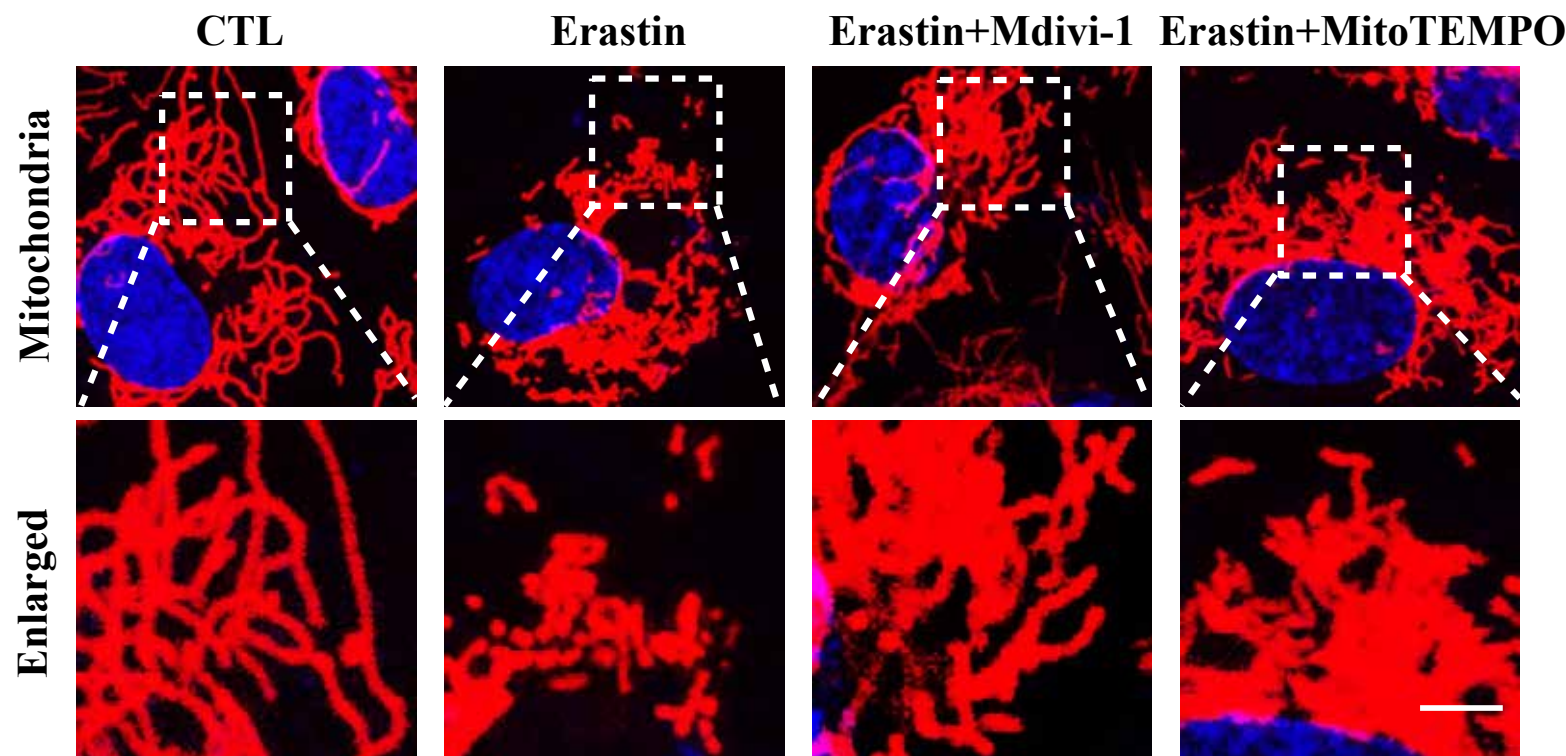**B**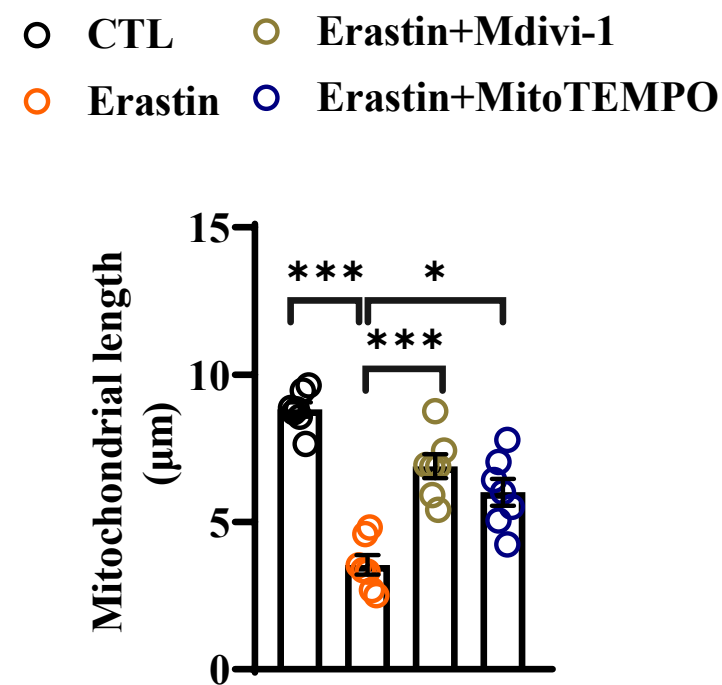**C**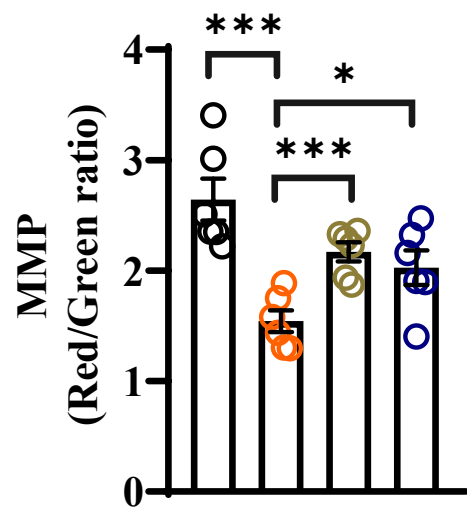**D**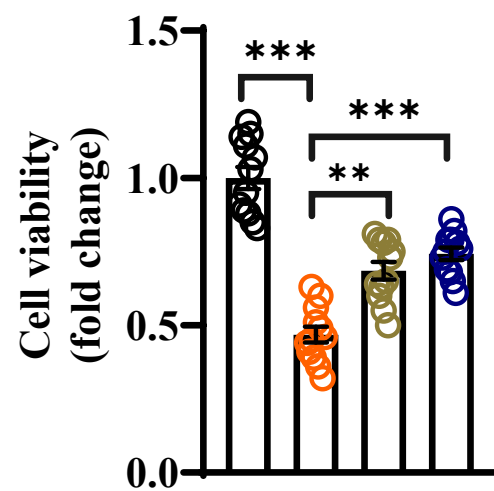

Supplement: Supplementary file 7 [file 1]

**A**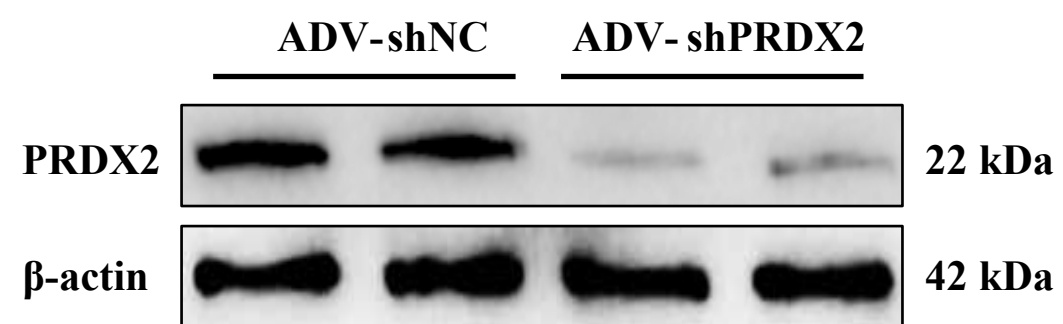**B**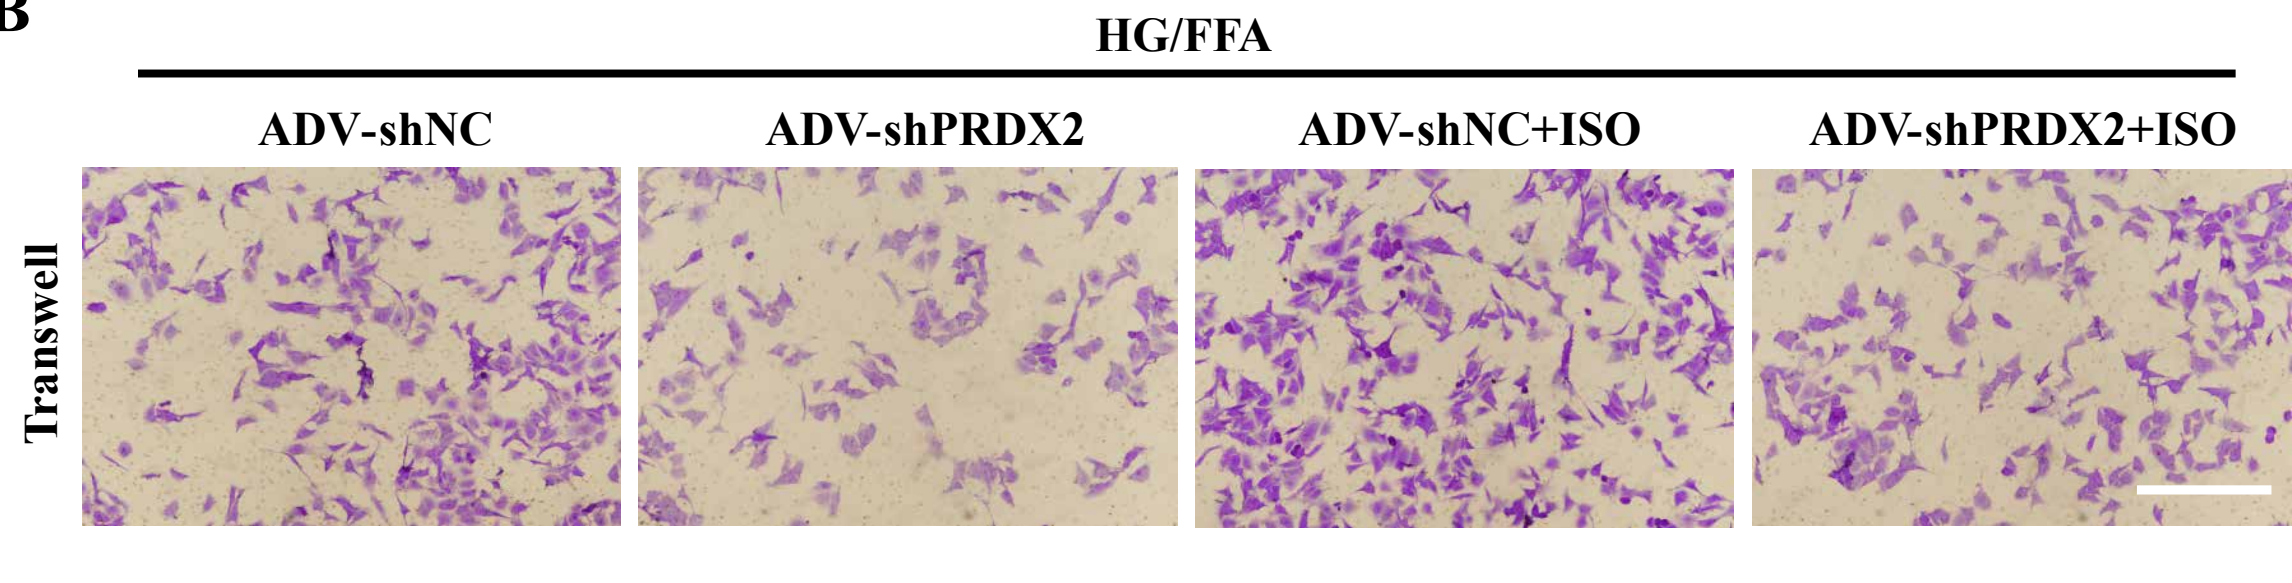**C**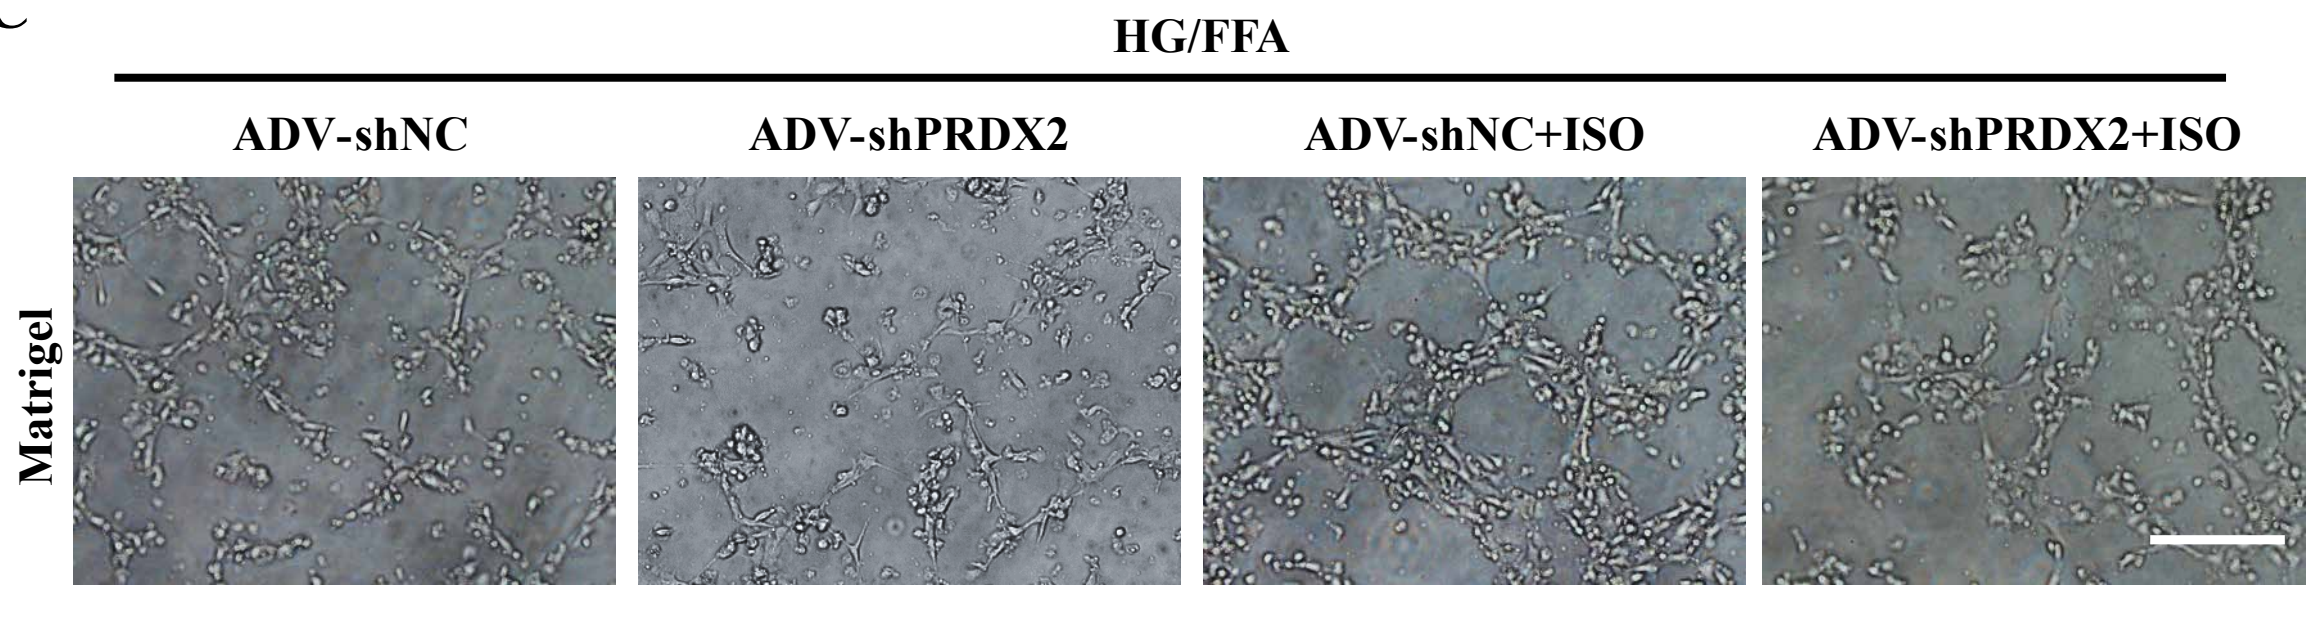**D**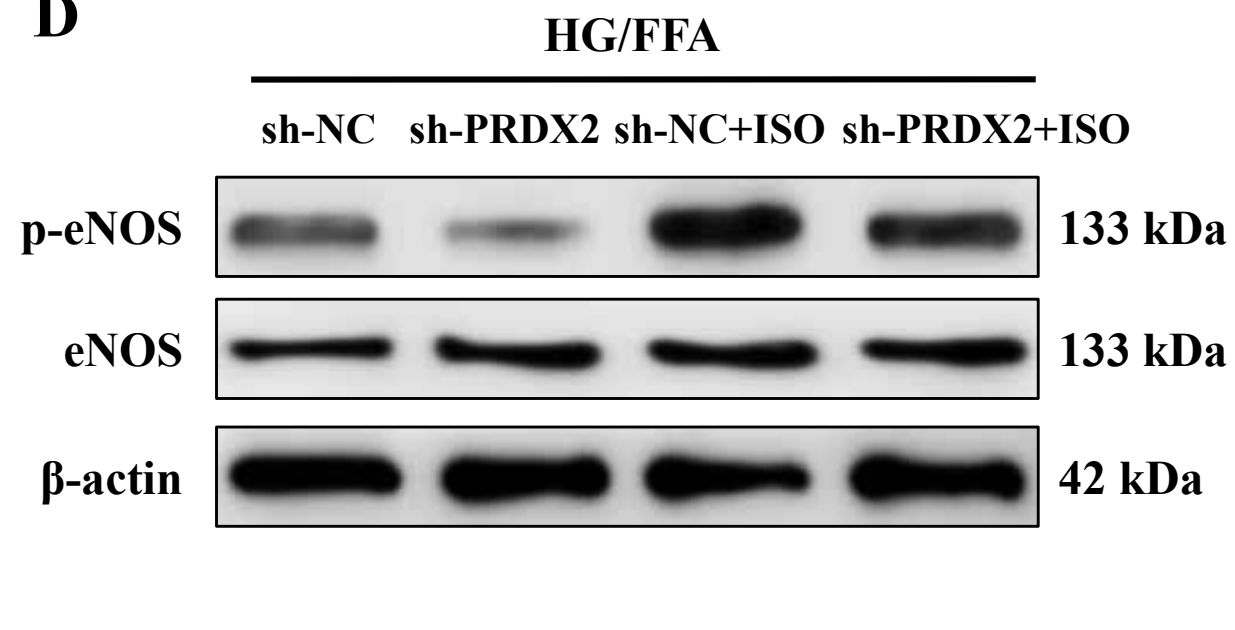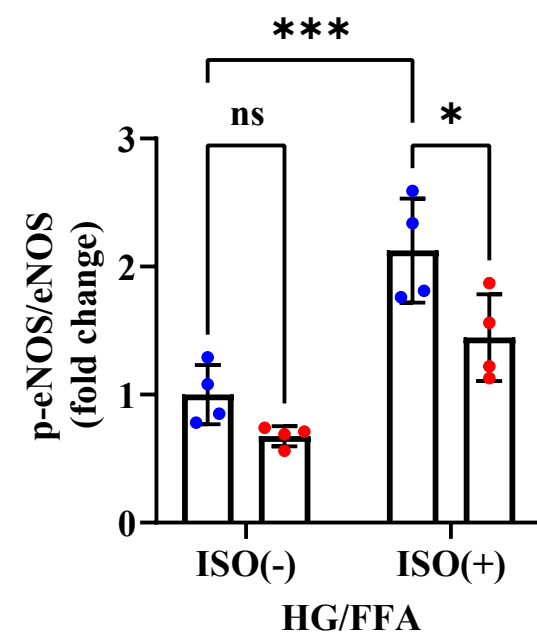**E**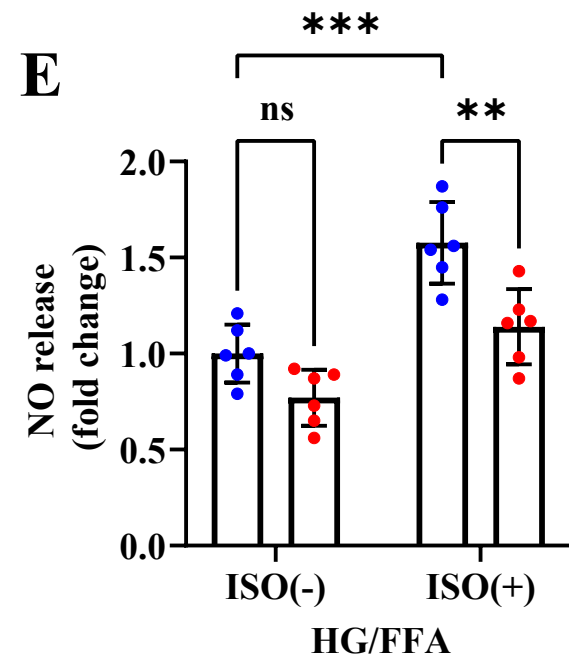

● ADV-shNC  
● ADV-shPRDX2

Supplement: Supplementary file 8 [file 1]

**A**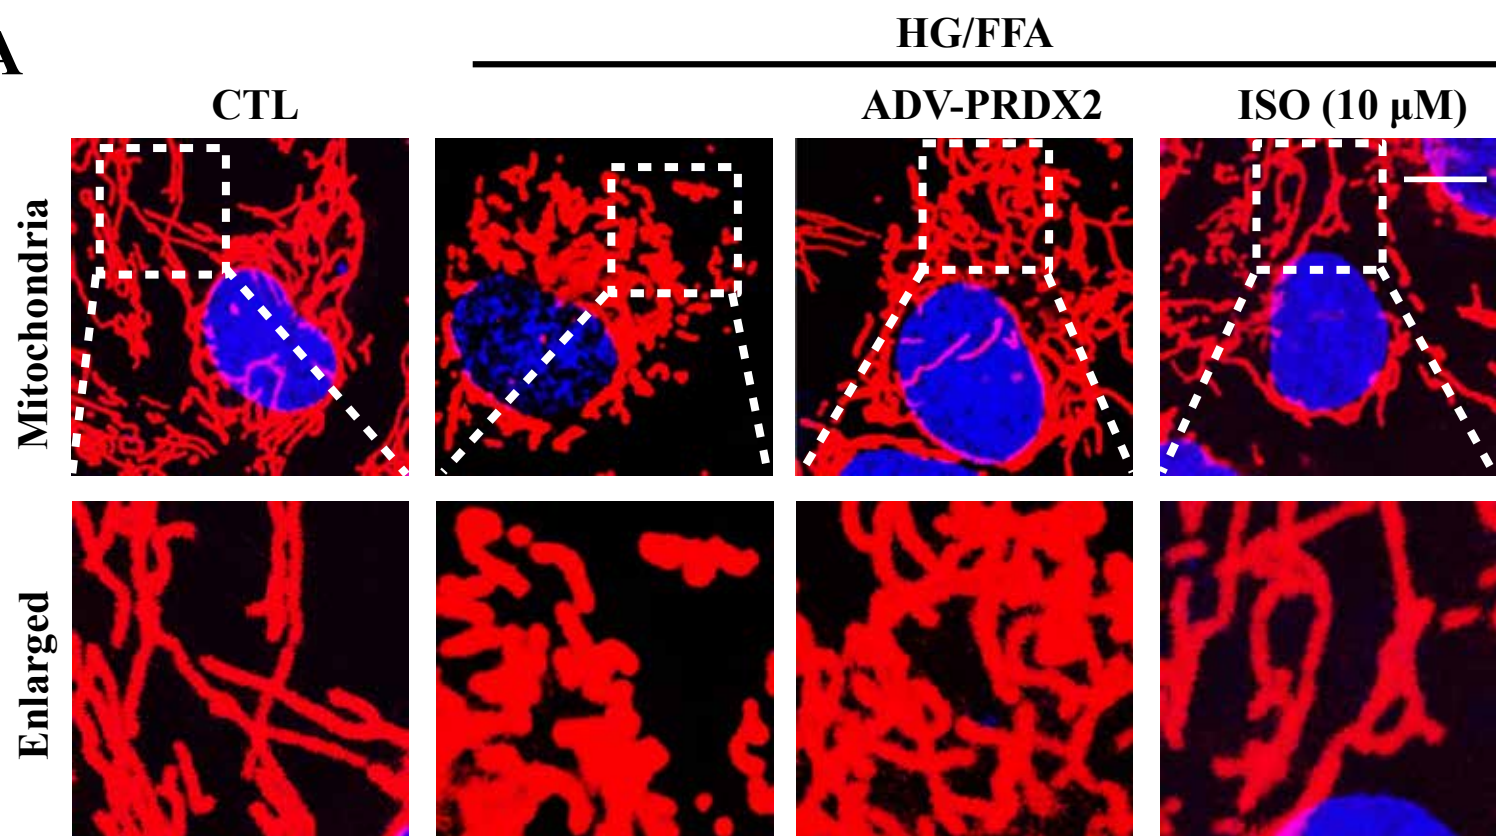

○ CTL      ○ HG/FFA+ADV-PRDX2  
○ HG/FFA      ○ HG/FFA+ISO (10  $\mu$ M)

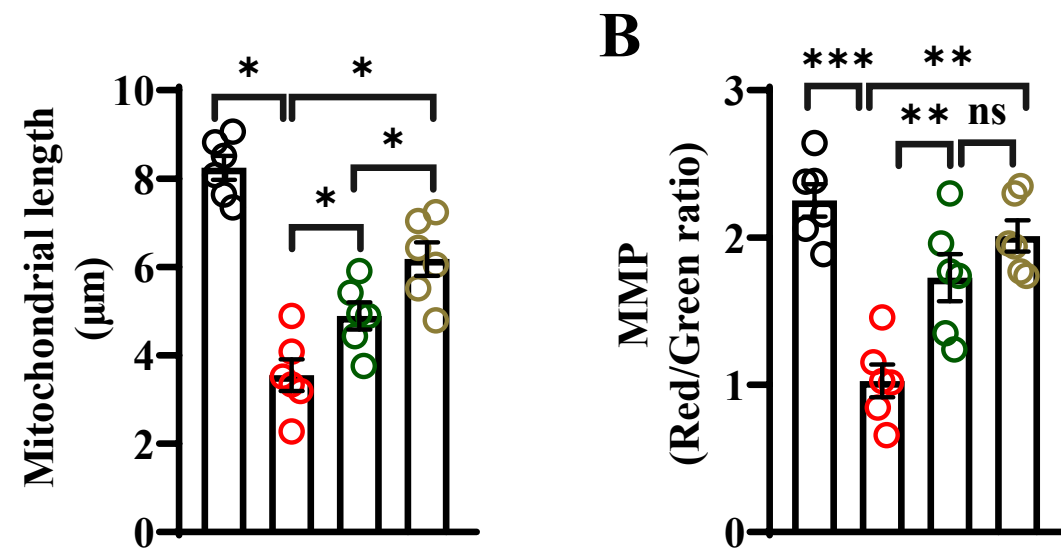**C**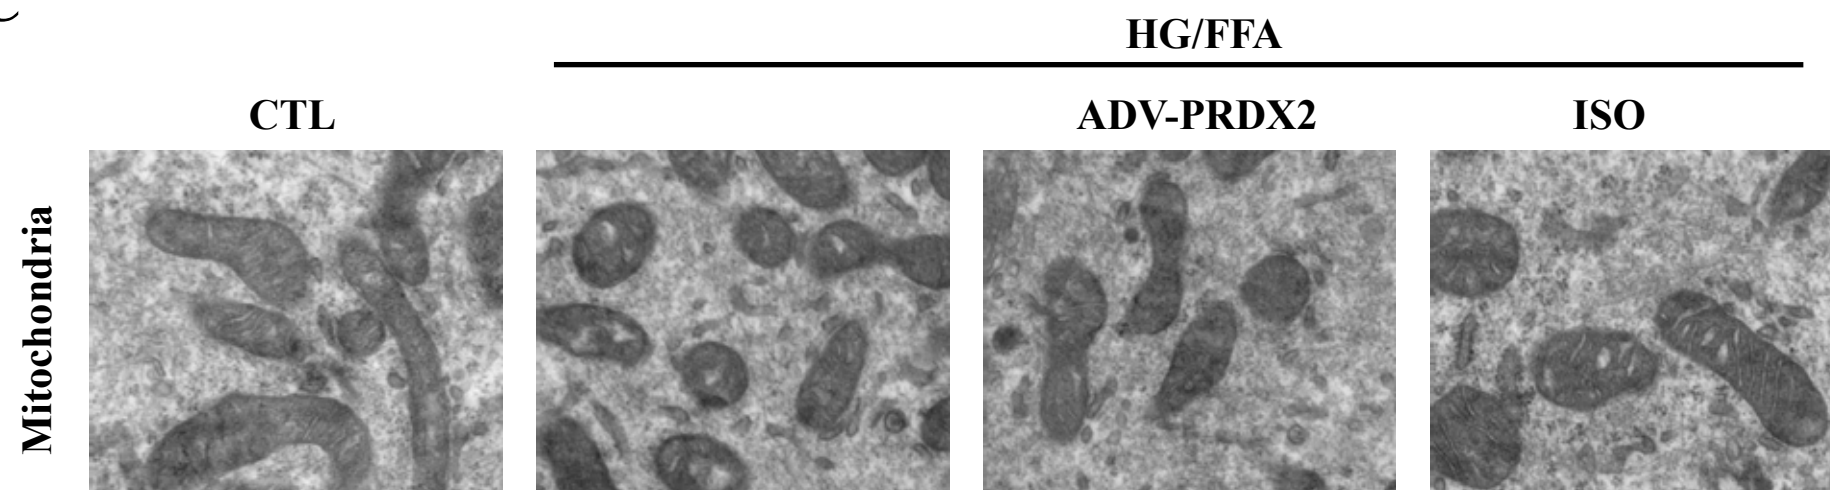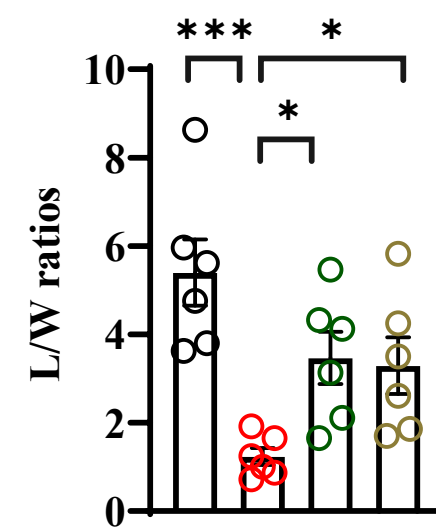**D**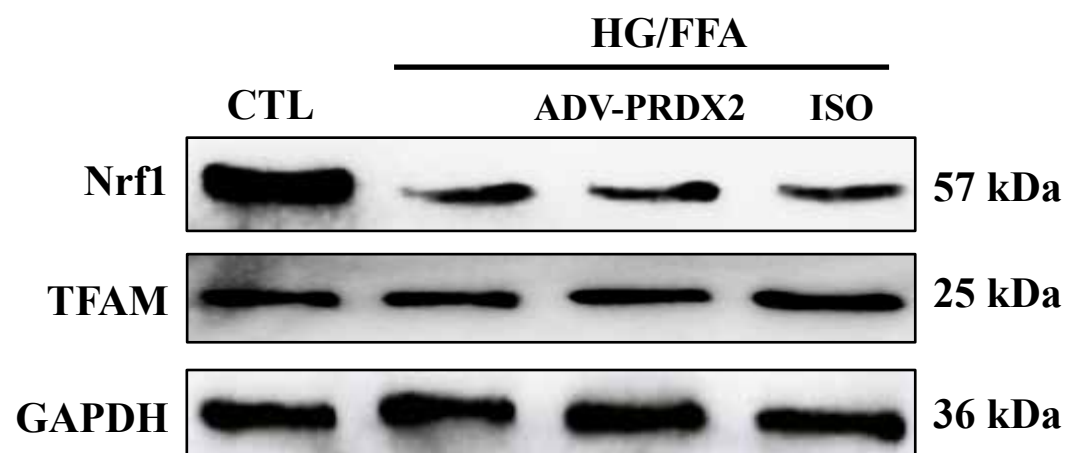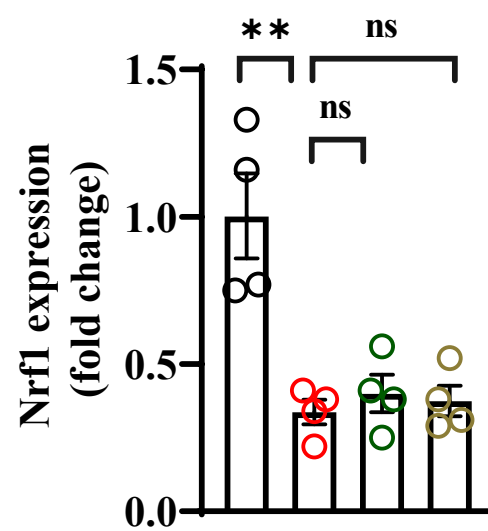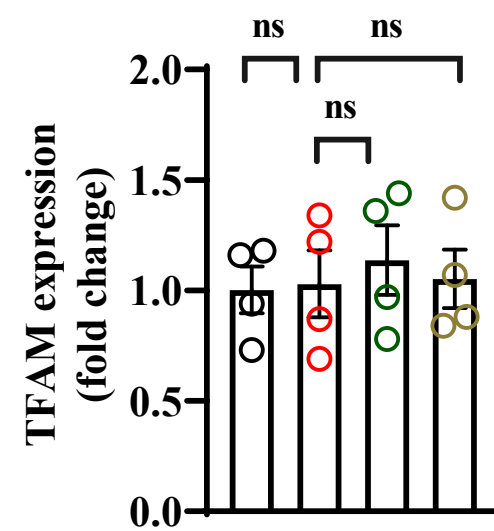

Supplement: Supplementary file 9 [file 1]
